# Supplementary material
Source: PubMed Central journal article supplement (PMC4371835)
Supplement: supp_tpc.114.124776_tpc124776_SupplementalData.pdf [file supp_tpc.114.124776_tpc124776_SupplementalData.pdf]

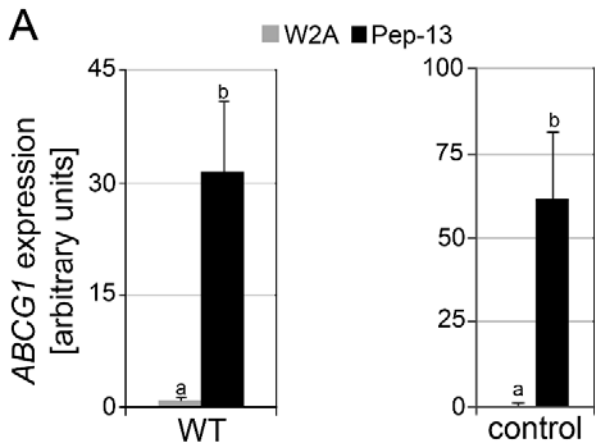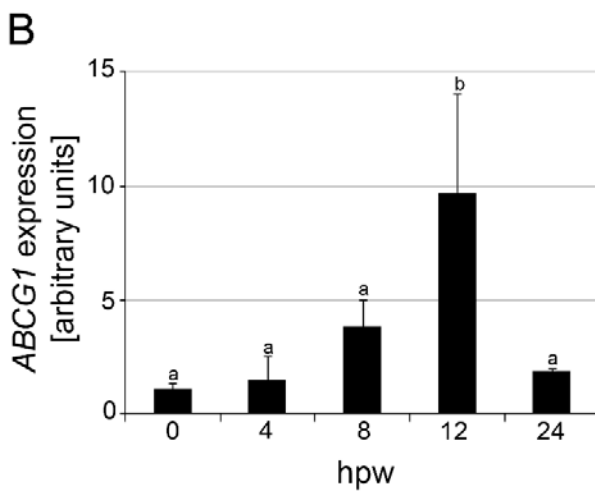

**C**

ATGTC AAGGATAGTAGCGGAAAATATGTTACAAGGGGGAGAAAATGTACA  
 ATTTTATGATCAAAGAGTACAACAAGCCATGGAGATGTCACAAGCCAGCG  
 CGTACTCTTACCCACCCTAGGCCAAATGCTAAAGCGCGTGGGAGACGTG  
 AGAAAAGAAGTCAACGGCGACGAAACTCCGGTGCACCGGATTCTCGATAT  
 GAGTGATACTCAAAGCATATCATCTCACTCTCTTCTTTTGTACTCTCCT  
 TCAACAACCTCACCTACAGCGTAAAAGTCCGCCGAAAATGCTTTTTCCG  
 GCGATACTCCGGCAACCGCCCGGAGTTTCCACCGGTGATCCCGTCGC  
 CGGAGAAAATCTGTTACGAACACAAAATTCCTCCTGAACAATATCTCCG  
 GTGAGGCCCGGGACGGCGAGATAGTCGCCGTCCTGGGTGCATCAGGGTCG  
 GGGAAATCGACCCTGATCGATGCCCTCGCAAATAGGATCGCGAAGGAGAG  
 TTTAAAAGGAACGATAACGTTGAACGGAGAGCCACTCGATTGAGATTGT  
 TGAAAAGTAATCTCAGCATATGTAATGCAAGATGATCTTTTATATCCAATG  
 TTGACAGTTGAAGAAACGTTAATGTTTGCAGCTGAATTCAGATTGCCACG  
 TAGTTTATCAAAATCAAAAAAGAAAATGAGAGTTCAAGCTTTGATTGATC  
 AATTAGGACTACGAAATGCTGCAAAAACAATCATTTGGTGATGAGGTAACG  
 TTATATATACAGTATAATTTTTTATCGATGCCTACAACTGATCATATTT  
 TTTTTTAACATTTAATAATAATTTACTATTTTGAACAACAGGGTCATCGT  
 GGAGTGTCTGGTGGTGAAGACGACGAGTTTCTATTGGAATTGATATTAT  
 TCATGACCCTATCATATTTGTTTCTAGACGAACCAACCTCAGGTCTTGATT  
 CGACTAGTGATACATGTTGGTGAAGTTCTTCAACGAATTGCTCAAAGT  
 GGAAGTATTGTGATCATGTCAATTCATCAGCCAAGTTATCGAATTCCTCGG  
 GTTATTGGATCGGATGCTCTTCTTGTCCCGTGGTCAAACGGTTTATAGCG  
 GGTACCTATGAACCTCCACATTTTTTTTTCTGATTTTGGTCAACCAATT

```
CCGGATAGTGAAAAATAGAACAGAGTTTGGCTCTGGATCTGATTCGCGAACT
AGAAGGGTCCCCTGGAGGGACAAAAAGTTTGGTTGAGTTCAACAAAACAT
GGGAAAAATACGAAAAGGAGTAATGAAAATCCTGAAATCCAACACCTACT
CATGGATTGTCATTGAAAGAAGCGATTAGCGCGAGTATTTCAAGAGGGAA
GTTGGTTTCAGGGACAACGAGTGATATTCATACTAGTCCAGCATCAATGG
TTCCAACCTTACGCGAATCCATTTTGGATTGAAATGCTTGTGTTGTCCAAG
AGATCATTTACGAATTTCTTGGAGGGTGCCAGAGTTATTTGGTATCCGTCT
AGGGGCAATCGTGGTCACGGGGTTCATCCTAGCTACCATGTTTTGGCAAC
TTGATGATTCCCCTAAAGGGGTTCAAGAAAGGCTTGGTTTCTTTGCATTT
GCTATGTCAACAACCTTTCTATACTTGC GCGGACGCGTTGCCTGTGTTCCCT
CCAAGAGAGGTACATTTTCATGAGGGAGACAGCTTATAATGCTTATAGGA
GATCTTCCTATTGTCTATCTCATGCTATAGTTTTCTTTGCCAGCATTGATC
TTTCTTAGCTTTGCATTTGCTGCTATAACTTTTTGGGGCTGTAGGCCTTGT
AGGTGGATTTTCGGGCTTTTTGTTCTATTTTCGCGATAATACTAGCCTCCT
TCTGGGCCGGGAATTCATTTGTACGTTTCTCCTCCTCCGGTGTAGTTCCTAGT
GTCATGTTAGGTTACACCATAGTGGTCGCGATCCTAGCATATTTCCCTCCT
CTTCTCAGGATCTTTCATCAATCGCGATAGGATTCCACCTTATTGGATAT
GGTTTCACTACCTATCTCTGGTGAAATATCCTTATGAAGCTGTGTTACAA
AATGAATTTGATGATGCAACAAAAGTGTTTTGTCAAAGGGATTCAATTGTT
TGATAATTCACCACCTTGAAATGTGCCTAATGCATTGAAGGAAAAATTGT
TGAGTACAATGAGTAACACATTAATGTCAAAATTACAAGTTCAACATGT
GTGACTACTGGGGCTGATATATTGGTTCAACAAGGGATTACTGATTTAAG
TAAGTGAATGTTTTGTGGATTACTATTGCATGGGGGTTTTTCTTTAGGG
TTTTGTTTTACTTTAGCTTGTGCTTGGAAAGTAAGAACAAGAGAAGGTGA
```

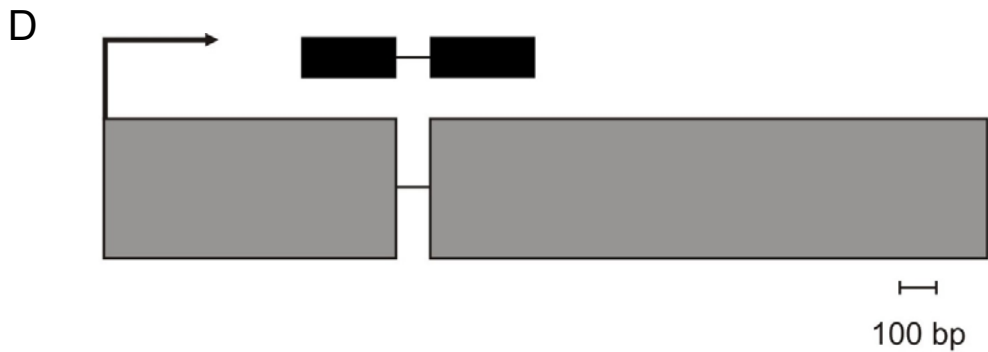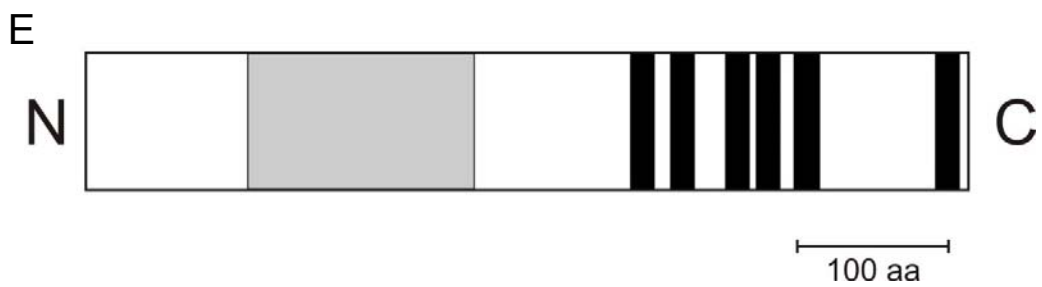

## Supplemental Figure 1

Structure and expression of the *ABCG1* gene.

A: Pep-13-induced *ABCG1* expression. Left panel: POCl microarrays (Kloosterman et al., 2008) were hybridized with cDNA generated from RNA of potato leaves 8 hours after infiltration of 100  $\mu$ M Pep-13 (black bar) or 100  $\mu$ M W2A (grey bar). Data are derived from three independent experiments. Error bars represent SEM. Letters indicate statistically different values (t-test,  $p \leq 0.03$ ). Right panel: Leaves of three week old wild type and transgenic plants carrying an empty vector (control) were infiltrated with 100  $\mu$ M Pep-13 (black bar) or 100  $\mu$ M W2A (grey bar). RNA was isolated 8 hours after treatment, reverse transcribed and analyzed for *ABCG1* transcript levels by qPCR. Expression of *EF1 $\alpha$*  was used as a reference. Data are derived from two independent experiments (n=8). Error bars represent SEM. Letters indicate statistically different values (t-test,  $p \leq 0.01$ ). B: Wound-induced expression of *ABCG1*. Leaves of wild type potato plants were wounded with a hemostat (hpw: hours post wounding). RNA was isolated from whole leaves at the time points indicated, reverse transcribed and analyzed for *ABCG1* transcript levels by qPCR. Expression of *EF1 $\alpha$*  was used as a reference. Data are derived from two (n $\geq$ 4) independent experiments. Error bars represent SD. Letters indicate significantly different values (one-way ANOVA,  $p \leq 0.01$ ) C: Nucleotide sequence of the *ABCG1* gene. The sequence was obtained from the genome sequence of *Solanum tuberosum* group *phureja* (Xu et al., 2011; XM\_006345853.1, <http://www.ncbi.nlm.nih.gov/>). Intron sequences are shown in italics. D: Schematic structure of the *ABCG1* gene and position of the *ABCG1*-RNAi construct. E: Schematic structure of the ABCG1 protein. The ATP binding domain (grey) and the six predicted transmembrane domains (black) are shown.

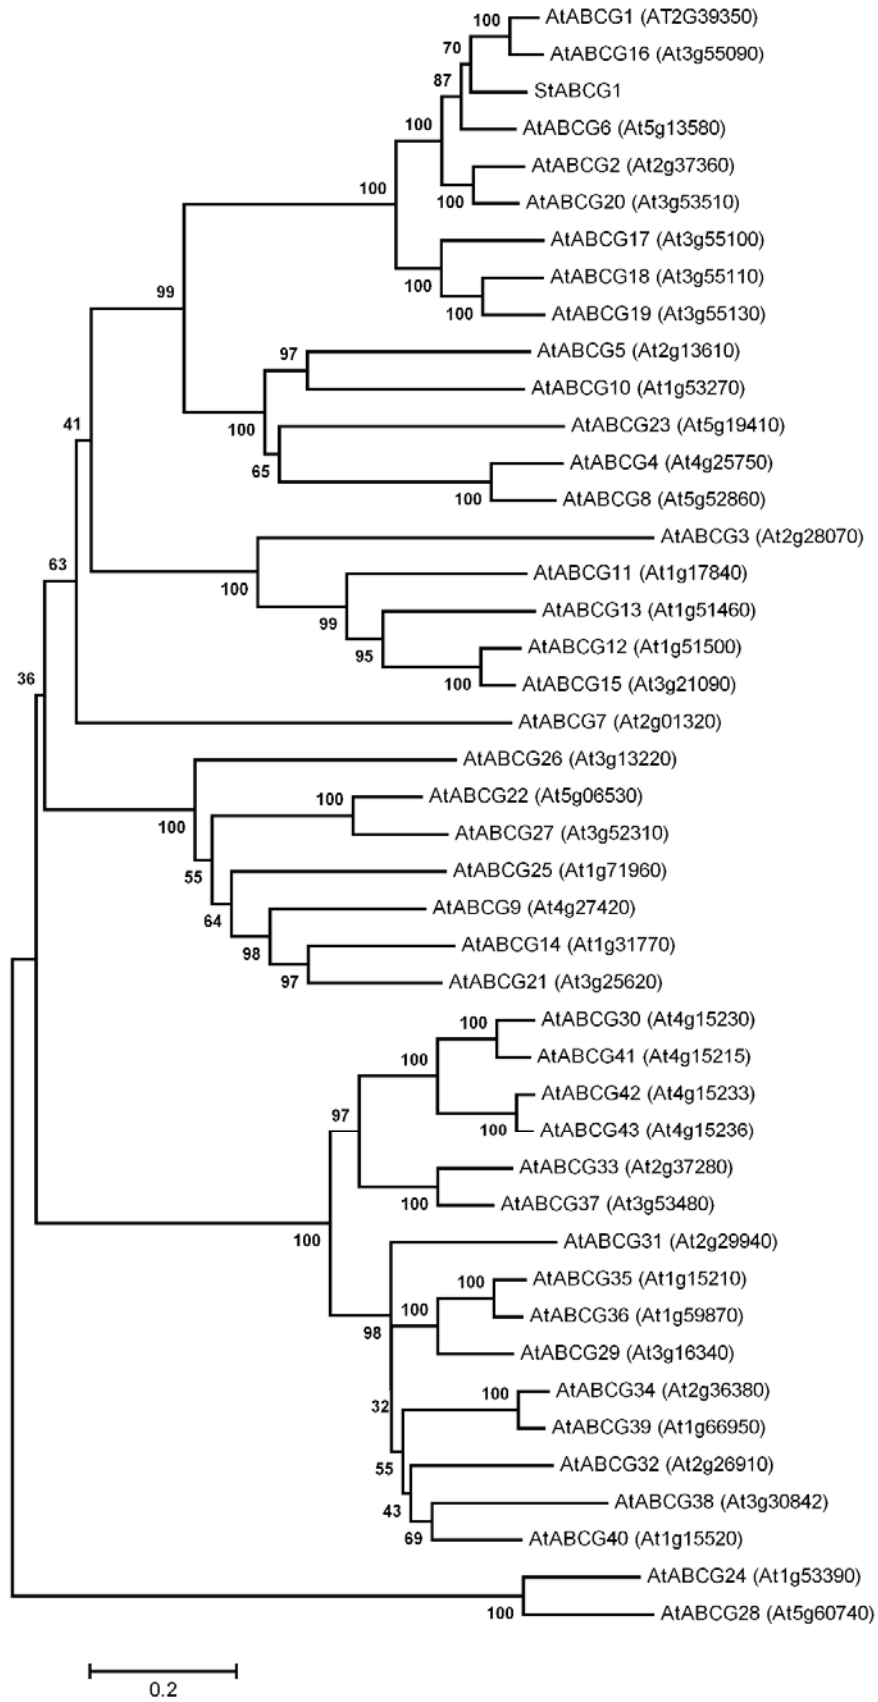

## **Supplemental Figure 2**

Evolutionary relationships of St-ABCG1 and At-ABCG1 to 43. The amino acid sequences of St-ABCG1 and At-ABCG1 to At-ABCG43 were compared. The evolutionary history was inferred using the Neighbor-Joining method (Saitou and Nei, 1987). The optimal tree with the sum of branch length = 11.04991171 is shown. The percentage of replicate trees in which the associated taxa clustered together in the bootstrap test (1000 replicates) are shown next to the branches (Felsenstein, 1985). The tree is drawn to scale, with branch lengths in the same units as those of the evolutionary distances used to infer the phylogenetic tree. The evolutionary distances were computed using the Poisson correction method (Zuckerkandl and Pauling, 1965) and are in the units of the number of amino acid substitutions per site. All positions containing gaps and missing data were eliminated from the dataset (complete deletion option). There were a total of 453 positions in the final dataset. Phylogenetic analyses were conducted in MEGA4 (Tamura et al., 2007).

A

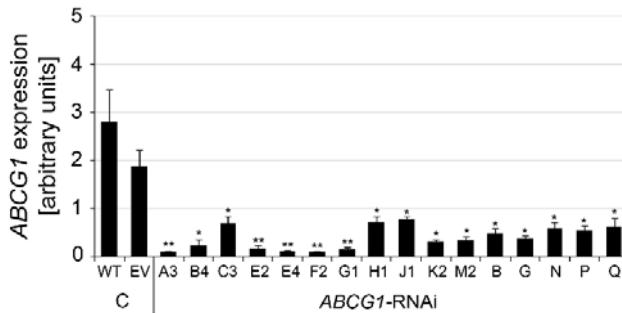

B

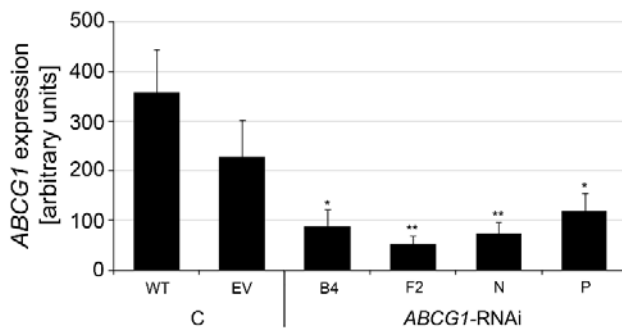

### Supplemental Figure 3

Reduced *ABCG1* expression in *ABCG1*-RNAi lines.

A: *ABCG1* expression in wounded *ABCG1*-RNAi plants. RNA was isolated from potato leaves six hours post wounding, reverse transcribed and analyzed for *ABCG1* transcript levels by qPCR. Data are derived from three independent experiments (wild type: n=12; empty vector plants: n=12; *ABCG1*-RNAi plants: n=6). Error bars represent SEM. Significance analysis of differences between *ABCG1*-RNAi and control was performed by t-test (\* p<0.05, \*\* p<0.01). B: *ABCG1* expression in *ABCG1*-RNAi tuber skin. RNA was isolated from tuber skin of three-month-old potato plants grown in a greenhouse. RNA was reverse transcribed and analyzed for *ABCG1* expression by qPCR. Data are derived from two independent experiments (n=4). Error bars represent SEM. Significance analysis of differences between *ABCG1*-RNAi, EV and WT was performed by t-test (two-tailed, unequal variances): \*p≤0.05; \*\*p≤0.01.

A

wildtype

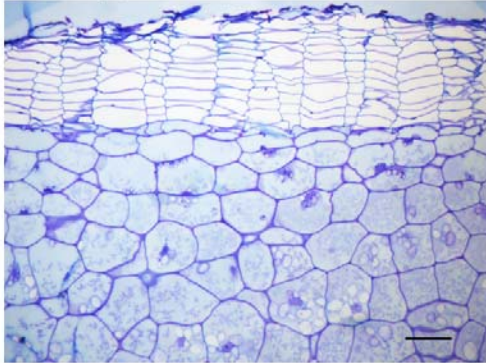

empty vector

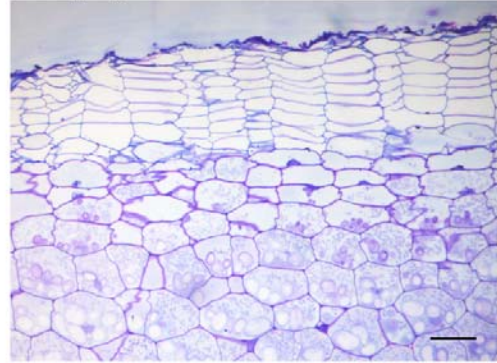

*ABCG1*-RNAi B4

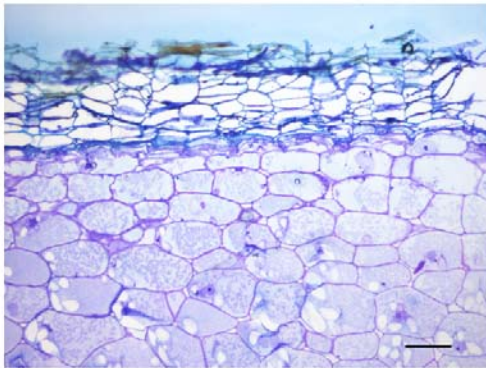

*ABCG1*-RNAi F2

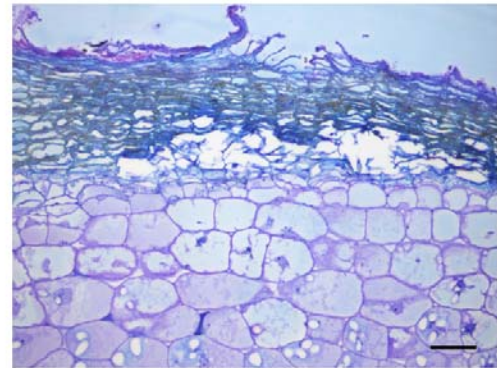

*ABCG1*-RNAi N

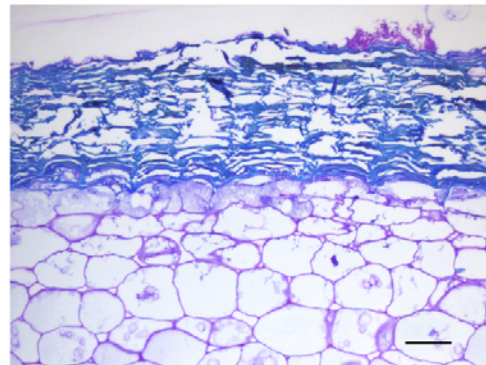

*ABCG1*-RNAi P

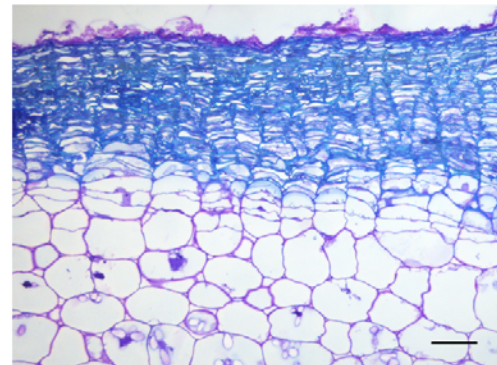

**B**

**WT**

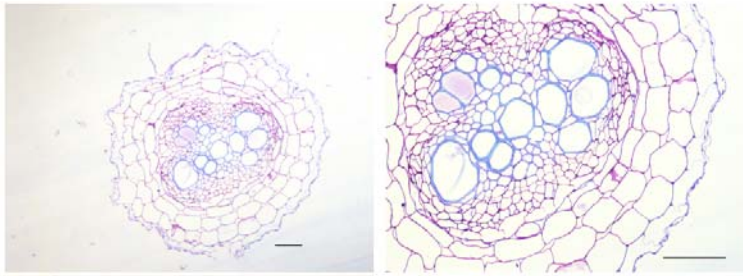

**EV**

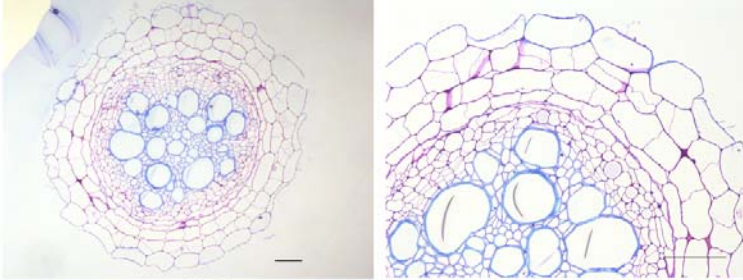

**B4**

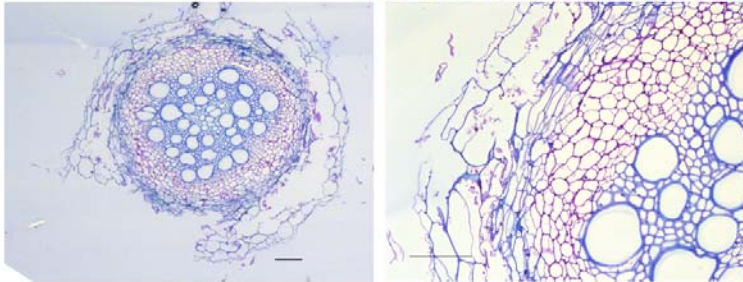

**E4**

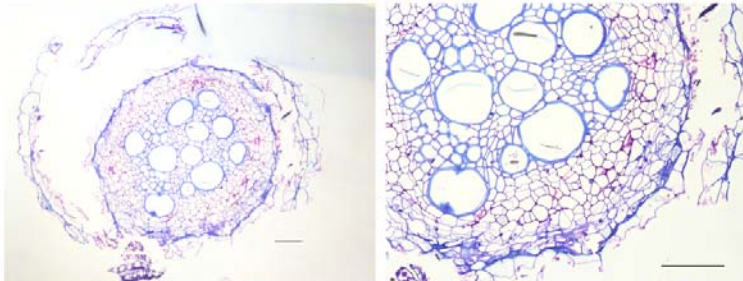

**F2**

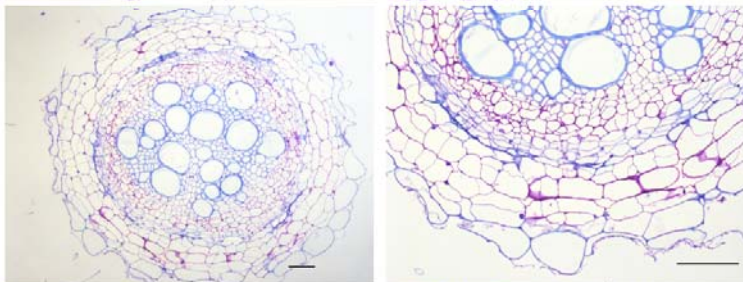

**K2**

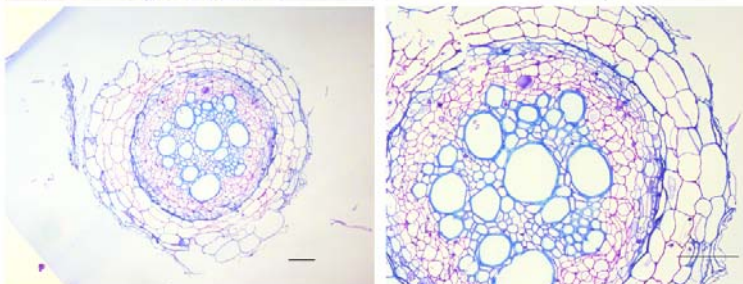



#### **Supplemental Figure 4**

Morphological alterations in tuber periderm and roots of *ABCG1*-RNAi lines. A: Microscopy of toluidine blue-stained periderm cross sections of wild type, empty vector and four independent *ABCG1*-RNAi plants. Tubers were harvested from three months old, greenhouse grown potato plants and analyzed after one week of storage at 4°C. Scale bars represent 5 µm. B: Microscopy of toluidine blue-stained root cross sections of wild type, empty vector and *ABCG1*-RNAi plants. Roots were harvested from three-month-old, greenhouse grown potato plants. Scale bars represent 1 µm.

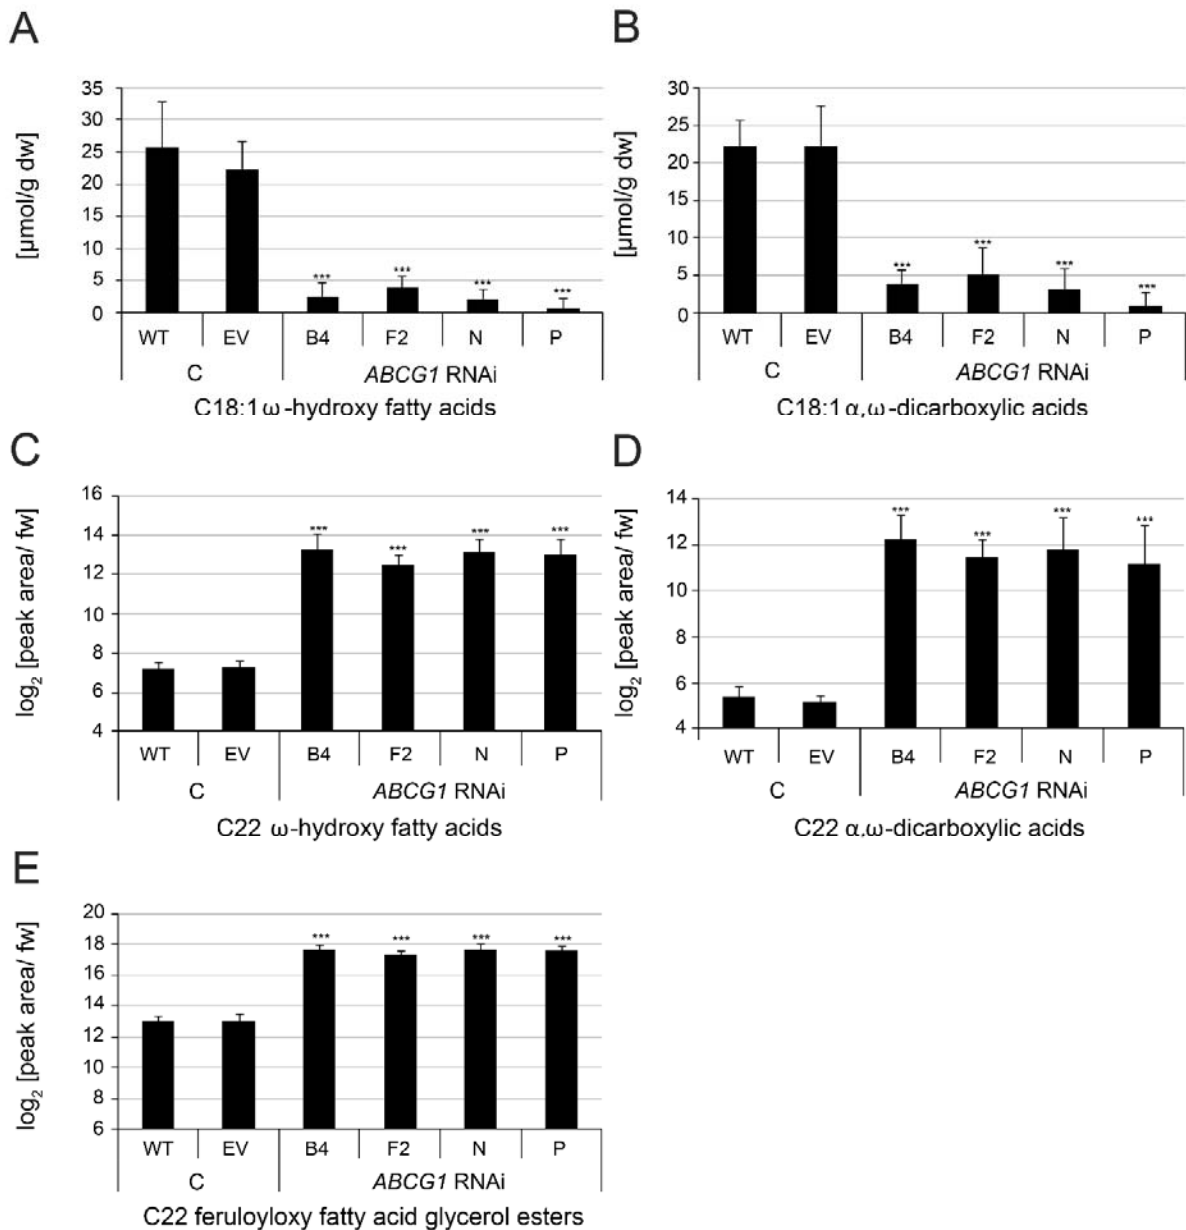

### Supplemental Figure 5

Suberin composition in individual *ABCG1*-RNAi lines. A: Relative Quantification of C18:1  $\omega$ -hydroxy fatty acid as well as  $\alpha,\omega$ -DCA (B) of wild type, empty vector and *ABCG1*-RNAi tuber periderm.

Digested and delipidated periderm disks were depolymerized and analyzed by GC/MS. Resulting peak areas were normalized to the peak area of the corresponding internal standard and to dry weight. Values shown represent medians  $\pm$  SD. Data are derived from

two independent experiments (n=8). Statistical analysis was performed by *t*-test (two-tailed, unequal variances): \*\*\* $p \leq 0.001$ .

C: Relative quantification of C22  $\omega$ -hydroxy fatty acids, C22  $\alpha,\omega$ -dicarboxylic acids (D) and C22 feruloyloxy fatty acid glycerol esters (E) in apolar extracts of wild type, empty vector and *ABCG1*-RNAi periderm. Methyl *tert*-butyl ether extracts of tuber periderm were prepared and analyzed by UPLC/PDA/ESI(-)-QTOFMS. Resulting peak areas were normalized to fresh weight and  $\log_2$ -transformed. Values shown represent medians  $\pm$  SD. Data are derived from two independent experiments (n=8). Statistical analysis was performed by *t*-test (two-tailed, unequal variances): \*\*\* $p \leq 0.001$ .

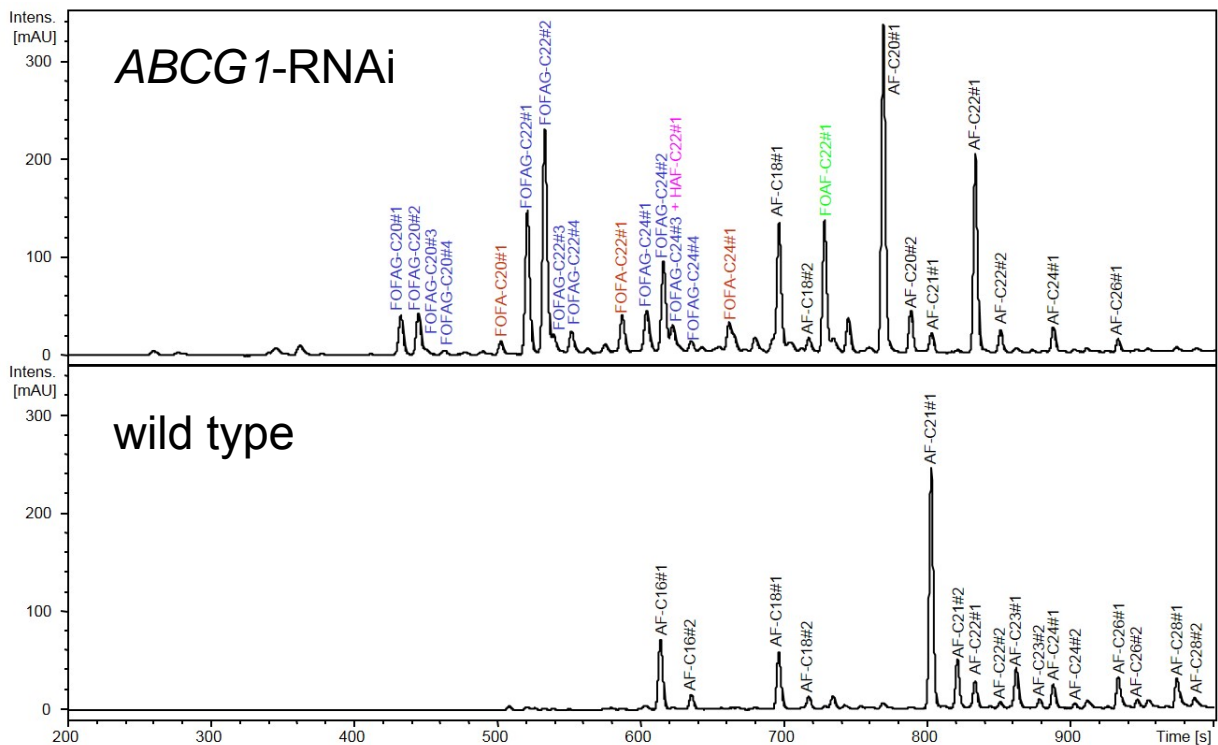

### Supplemental Figure 6

UV chromatograms (324 nm) obtained from apolar extracts of *ABCG1*-RNAi and wild type tuber periderm. Major ferulic acid conjugates are labeled as follows: AF, Alkyl Ferulate; HAF, HydroxyAlkyl Ferulate; FOAF, FeruloyloxyAlkyl Ferulate; FOFA, FeruloyloxyFatty Acid; FOFAG, FeruloyloxyFatty Acid Glycerol ester.

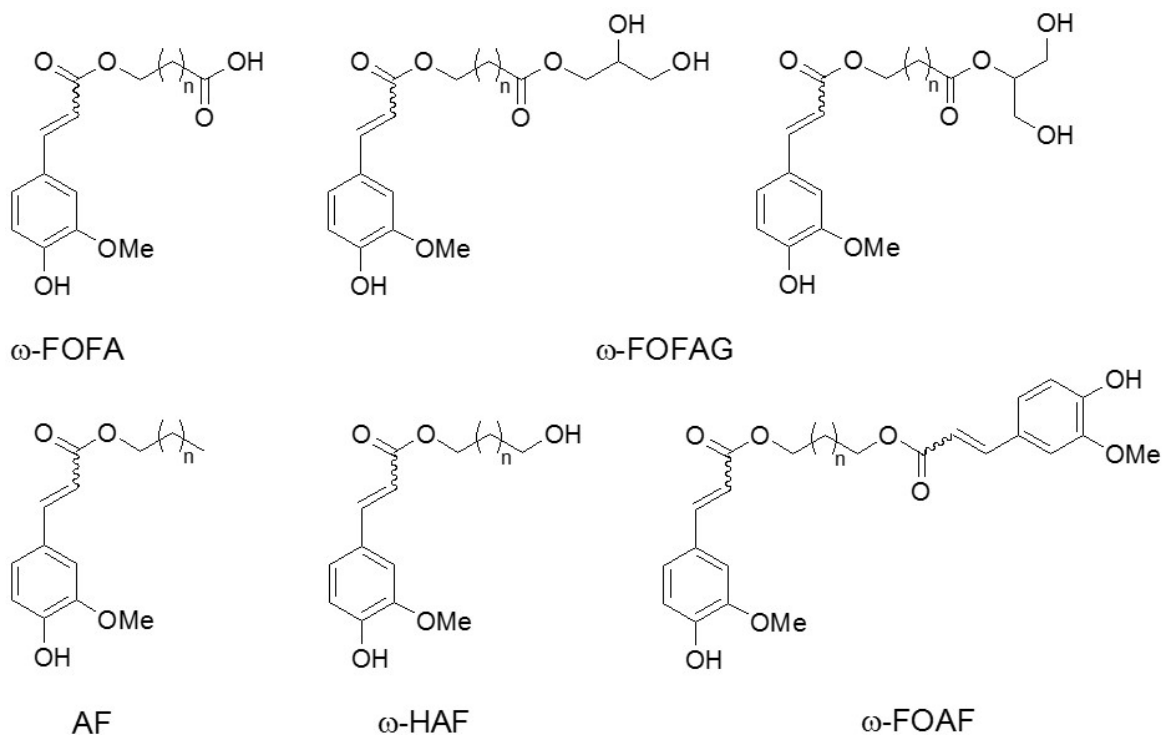

### Supplemental Figure 7

Putative molecular structures of ferulic acid conjugates detectable in apolar extracts of *ABCG1*-RNAi tuber periderm.  $\omega$ -FOFA,  $\omega$ -feruloyloxy fatty acid;  $\omega$ -FOFAG,  $\omega$ -feruloyloxy fatty acid glycerol ester; AF, alkyl ferulate;  $\omega$ -HAF,  $\omega$ -hydroxy alkyl ferulate;  $\omega$ -FOAF,  $\omega$ -feruloyloxy alkyl ferulate.

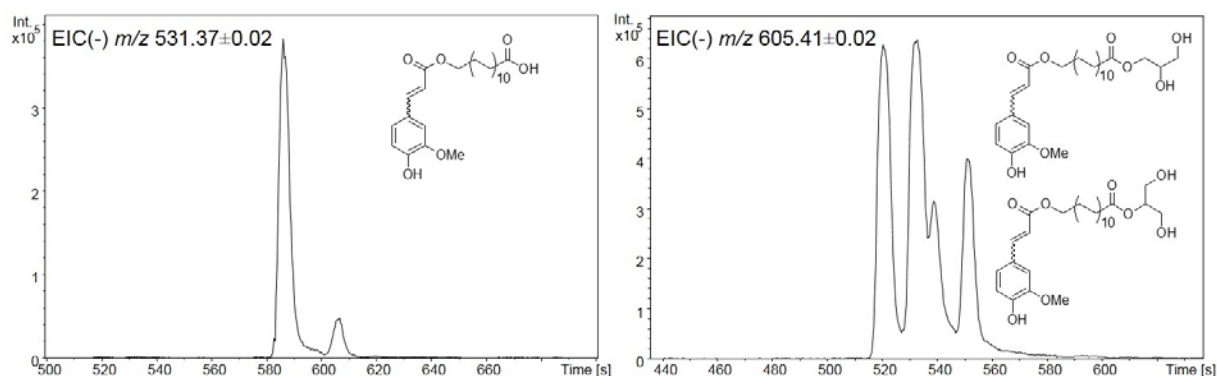

### Supplemental Figure 8

Extracted ion chromatograms (EICs) corresponding to deprotonated molecular ions of feruloyloxy docosanoic acid (left) and feruloyloxy docosanoyl glycerol (right) obtained from apolar extracts of *ABCG1*-RNAi tuber periderm by UPLC/PDA/ESI(-)-QTOFMS.

Under the applied chromatographic conditions, two isomeric forms were separable for alkyl ferulates, hydroxy alkyl ferulates, feruloyloxy alkyl ferulates and feruloyloxy fatty acids due to the occurrence of (*E*)- and (*Z*)-configured feruloyl moieties. For feruloyloxy fatty acid glycerol esters, twice the number of isomers could be resolved due to the presence of (*E*)- and (*Z*)-configured feruloyl as well as 1-/3- and 2-acylated glycerol moieties.

**Supplemental Table 1.** Analytical Data of 1-Trimethylsilyloxy Alkanes Detected by GC/EI-QMS.

| analyte | elemental comp.                     | M   | ret. time [min] | quantifier ion m/z (rel. int. [%]) | qualifier ions m/z (rel. int. [%]) |         | MF <sup>1</sup>  | internal standard for quantification |
|---------|-------------------------------------|-----|-----------------|------------------------------------|------------------------------------|---------|------------------|--------------------------------------|
| C15:0   | C <sub>18</sub> H <sub>40</sub> OSi | 300 | 10.78           | 285 (100)                          | 103 (17)                           | 75 (49) | 885              | internal standard                    |
| C16:0   | C <sub>19</sub> H <sub>42</sub> OSi | 314 | 11.87           | 299 (100)                          | 103 (25)                           | -       | - <sup>2</sup>   | pentadecanol (1TMS)                  |
| C18:0   | C <sub>21</sub> H <sub>46</sub> OSi | 342 | 13.94           | 327 (100)                          | 103 (19)                           | 75 (51) | 925              | pentadecanol (1TMS)                  |
| C20:0   | C <sub>23</sub> H <sub>50</sub> OSi | 370 | 15.89           | 355 (100)                          | 103 (21)                           | 75 (60) | 899              | pentadecanol (1TMS)                  |
| C22:0   | C <sub>25</sub> H <sub>54</sub> OSi | 398 | 17.73           | 383 (100)                          | 103 (18)                           | 75 (40) | 910              | pentadecanol (1TMS)                  |
| C24:0   | C <sub>27</sub> H <sub>58</sub> OSi | 426 | 19.37           | 411 (100)                          | 103 (22)                           | 75 (48) | 910              | pentadecanol (1TMS)                  |
| C26:0   | C <sub>29</sub> H <sub>62</sub> OSi | 454 | 20.89           | 439 (100)                          | 103 (19)                           | 75 (40) | 942              | pentadecanol (1TMS)                  |
| C28:0   | C <sub>31</sub> H <sub>66</sub> OSi | 482 | 22.35           | 467 (100)                          | 103 (14)                           | 75 (22) | 918              | pentadecanol (1TMS)                  |
| C30:0   | C <sub>33</sub> H <sub>70</sub> OSi | 510 | 23.64           | 495 (100)                          | 103 (17)                           | -       | 692 <sup>3</sup> | pentadecanol (1TMS)                  |

<sup>1</sup> match factor obtained from NIST MS Search 2.0 using NIST/EPA/NIH Mass Spectral Library 2011<sup>2</sup> co-eluting with the major isomer of methyl ferulate (1TMS)<sup>3</sup> co-eluting with methyl tricontanoate**Supplemental Table 2.** Analytical Data of  $\alpha,\omega$ -Dicarboxylic Acid Dimethyl Esters Detected by GC/EI-QMS.

| analyte          | elemental comp.                                | M   | ret. time [min] | quantifier ion m/z (rel. int. [%]) | qualifier ions m/z (rel. int. [%]) |          | MF <sup>1</sup>  | internal standard for quantification |
|------------------|------------------------------------------------|-----|-----------------|------------------------------------|------------------------------------|----------|------------------|--------------------------------------|
| C16:0            | C <sub>18</sub> H <sub>34</sub> O <sub>4</sub> | 314 | 14.94           | 98 (87)                            | 283 (16)                           | 74 (100) | 823              | methyl heptadecanoate                |
| C18:1 $\Delta$ 9 | C <sub>20</sub> H <sub>36</sub> O <sub>4</sub> | 340 | 16.64           | 276 (43)                           | 309 (21)                           | 340 (3)  | - <sup>2,3</sup> | methyl heptadecanoate                |
| C20:0            | C <sub>22</sub> H <sub>42</sub> O <sub>4</sub> | 370 | 18.64           | 98 (64)                            | 339 (17)                           | 74 (100) | 805              | methyl heptadecanoate                |
| C22:0            | C <sub>24</sub> H <sub>46</sub> O <sub>4</sub> | 398 | 20.25           | 98 (64)                            | 367 (13)                           | 74 (100) | 882              | methyl heptadecanoate                |
| C24:0            | C <sub>26</sub> H <sub>50</sub> O <sub>4</sub> | 426 | 21.77           | 98 (59)                            | 395 (12)                           | 74 (100) | - <sup>2</sup>   | methyl heptadecanoate                |

<sup>1</sup> match factor obtained from NIST MS Search 2.0 using NIST/EPA/NIH Mass Spectral Library 2011<sup>2</sup> spectrum not contained in NIST/EPA/NIH Mass Spectral Library 2011<sup>3</sup> for a reference spectrum see Kolattukudy and Agrawal, *Lipids* (1974) **9**, 682-691**Supplemental Table 3.** Analytical Data of Fatty Acid Methyl Esters Detected by GC/EI-QMS.

| analyte | elemental comp.                                | M   | ret. time [min] | quantifier ion m/z (rel. int. [%]) | qualifier ions m/z (rel. int. [%]) |          | MF <sup>1</sup> | internal standard for quantification |
|---------|------------------------------------------------|-----|-----------------|------------------------------------|------------------------------------|----------|-----------------|--------------------------------------|
| C17:0   | C <sub>18</sub> H <sub>36</sub> O <sub>2</sub> | 284 | 12.56           | 74 (100)                           | 87 (68)                            | 284 (8)  | 908             | internal standard                    |
| C20:0   | C <sub>21</sub> H <sub>42</sub> O <sub>2</sub> | 326 | 15.64           | 74 (100)                           | 87 (71)                            | 326 (13) | 798             | methyl heptadecanoate                |
| C22:0   | C <sub>23</sub> H <sub>46</sub> O <sub>2</sub> | 354 | 17.54           | 74 (100)                           | 87 (72)                            | 354 (18) | 872             | methyl heptadecanoate                |
| C24:0   | C <sub>25</sub> H <sub>50</sub> O <sub>2</sub> | 382 | 19.23           | 74 (100)                           | 87 (74)                            | 382 (20) | 852             | methyl heptadecanoate                |
| C26:0   | C <sub>27</sub> H <sub>54</sub> O <sub>2</sub> | 410 | 20.80           | 74 (100)                           | 87 (73)                            | 410 (25) | 898             | methyl heptadecanoate                |
| C28:0   | C <sub>29</sub> H <sub>58</sub> O <sub>2</sub> | 438 | 22.28           | 74 (100)                           | 87 (79)                            | 438 (40) | 880             | methyl heptadecanoate                |
| C30:0   | C <sub>31</sub> H <sub>62</sub> O <sub>2</sub> | 466 | 23.62           | 74 (100)                           | 87 (82)                            | 466 (40) | 856             | methyl heptadecanoate                |

<sup>1</sup> match factor obtained from NIST MS Search 2.0 using NIST/EPA/NIH Mass Spectral Library 2011

**Supplemental Table 4.** Analytical Data of  $\omega$ -Trimethylsilyloxy Fatty Acid Methyl Esters Detected by GC/EI-QMS.

| analyte          | elemental comp.                                   | M   | ret. time [min] | quantifier ion $m/z$ (rel. int. [%]) | qualifier ions $m/z$ (rel. int. [%]) | MF <sup>1</sup>  | internal standard for quantification    |
|------------------|---------------------------------------------------|-----|-----------------|--------------------------------------|--------------------------------------|------------------|-----------------------------------------|
| C15:0            | C <sub>19</sub> H <sub>40</sub> O <sub>3</sub> Si | 344 | 14.23           | 297 (100)                            | 329 (43) 146 (9)                     | - <sup>2</sup>   | internal standard                       |
| C16:0            | C <sub>20</sub> H <sub>42</sub> O <sub>3</sub> Si | 358 | 15.22           | 311 (100)                            | 343 (26) 146 (10)                    | 860              | methyl 15-hydroxy pentadecanoate (1TMS) |
| C18:0            | C <sub>22</sub> H <sub>46</sub> O <sub>3</sub> Si | 386 | 17.14           | 339 (100)                            | 371 (32) 146 (13)                    | - <sup>2</sup>   | methyl 15-hydroxy pentadecanoate (1TMS) |
| C18:1 $\Delta$ 9 | C <sub>22</sub> H <sub>44</sub> O <sub>3</sub> Si | 384 | 16.94           | 337 (52)                             | 369 (94) 146 (14)                    | 824 <sup>3</sup> | methyl 15-hydroxy pentadecanoate (1TMS) |
| C20:0            | C <sub>24</sub> H <sub>50</sub> O <sub>3</sub> Si | 414 | 18.80           | 367 (100)                            | 399 (55) 146 (18)                    | - <sup>2</sup>   | methyl 15-hydroxy pentadecanoate (1TMS) |
| C22:0            | C <sub>26</sub> H <sub>54</sub> O <sub>3</sub> Si | 442 | 20.39           | 395 (100)                            | 427 (44) 146 (24)                    | 801              | methyl 15-hydroxy pentadecanoate (1TMS) |
| C24:0            | C <sub>28</sub> H <sub>58</sub> O <sub>3</sub> Si | 470 | 21.86           | 423 (100)                            | 455 (53) 146 (24)                    | - <sup>2</sup>   | methyl 15-hydroxy pentadecanoate (1TMS) |
| C26:0            | C <sub>30</sub> H <sub>62</sub> O <sub>3</sub> Si | 498 | 23.24           | 451 (100)                            | 483 (63) 146 (29)                    | - <sup>2</sup>   | methyl 15-hydroxy pentadecanoate (1TMS) |
| C28:0            | C <sub>32</sub> H <sub>66</sub> O <sub>3</sub> Si | 526 | 24.53           | 479 (100)                            | 511 (80) 146 (36)                    | - <sup>2</sup>   | methyl 15-hydroxy pentadecanoate (1TMS) |
| C30:0            | C <sub>34</sub> H <sub>70</sub> O <sub>3</sub> Si | 554 | 25.74           | 507 (100)                            | 539 (77) 146 (25)                    | - <sup>2</sup>   | methyl 15-hydroxy pentadecanoate (1TMS) |

<sup>1</sup> match factor obtained from NIST MS Search 2.0 using NIST/EPA/NIH Mass Spectral Library 2011<sup>2</sup> spectrum not contained in NIST/EPA/NIH Mass Spectral Library 2011<sup>3</sup> for a reference spectrum see Brieskorn and Binnemann, *Z. Lebensm. Unters. Forsch.* (1974) **154**, 213-220**Supplemental Table 5.** Analytical Data of Feruloyloxy Fatty Acids Detected by UPLC/ESI(-)-QTOFMS.

| analyte | elemental comp.                                | ret. time [s]    | quantifier ion     |                |           |     | mSigma <sup>1</sup>                                                                                                      | prominent fragment ions upon CID<br>precursor ion@collision energy: $m/z$ (rel. int. [%], ion type <sup>3</sup> ) |
|---------|------------------------------------------------|------------------|--------------------|----------------|-----------|-----|--------------------------------------------------------------------------------------------------------------------------|-------------------------------------------------------------------------------------------------------------------|
|         |                                                |                  | type               | measured $m/z$ | error ppm |     |                                                                                                                          |                                                                                                                   |
| C16:0   | C <sub>26</sub> H <sub>40</sub> O <sub>6</sub> | 316 <sup>2</sup> | [M-H] <sup>-</sup> | 447.2753       | 0.2       | 19  | <b>447@30 eV:</b> 447 (29), 415 (37, <b>a</b> ), 345 (27, <b>b</b> ), 271 (64, <b>c</b> ), 193 (14), 175 (100), 160 (31) |                                                                                                                   |
| C18:0   | C <sub>28</sub> H <sub>44</sub> O <sub>6</sub> | 410 <sup>2</sup> | [M-H] <sup>-</sup> | 475.3056       | 1.9       | 9.7 | <b>475@30 eV:</b> 475 (49), 443 (32, <b>a</b> ), 373 (25, <b>b</b> ), 299 (62, <b>c</b> ), 193 (13), 175 (100), 160 (25) |                                                                                                                   |
| C18:1   | C <sub>28</sub> H <sub>42</sub> O <sub>6</sub> | 347 <sup>2</sup> | [M-H] <sup>-</sup> | 473.2895       | 2.9       | 6.4 | <b>473@30 eV:</b> 473 (30), 441 (27, <b>a</b> ), 371 (3, <b>b</b> ), 297 (56, <b>c</b> ), 193 (13), 175 (100), 160 (23)  |                                                                                                                   |
| C18:2   | C <sub>28</sub> H <sub>40</sub> O <sub>6</sub> | 288 <sup>2</sup> | [M-H] <sup>-</sup> | 471.2757       | 1.0       | 16  | <b>471@30 eV:</b> 471 (28), 439 (26, <b>a</b> ), 369 (8, <b>b</b> ), 295 (79, <b>c</b> ), 193 (23), 175 (100), 160 (30)  |                                                                                                                   |
| C19:0   | C <sub>29</sub> H <sub>46</sub> O <sub>6</sub> | 456 <sup>2</sup> | [M-H] <sup>-</sup> | 489.3205       | 3.4       | 28  | <b>489@30 eV:</b> 489 (60), 457 (33, <b>a</b> ), 387 (20, <b>b</b> ), 313 (51, <b>c</b> ), 193 (18), 175 (100), 160 (18) |                                                                                                                   |
| C20:0   | C <sub>30</sub> H <sub>48</sub> O <sub>6</sub> | 501 <sup>2</sup> | [M-H] <sup>-</sup> | 503.3372       | 1.2       | 9.2 | <b>503@30 eV:</b> 503 (56), 471 (23, <b>a</b> ), 401 (13, <b>b</b> ), 327 (48, <b>c</b> ), 193 (12), 175 (100), 160 (14) |                                                                                                                   |
| C21:0   | C <sub>31</sub> H <sub>50</sub> O <sub>6</sub> | 544 <sup>2</sup> | [M-H] <sup>-</sup> | 517.3527       | 1.5       | 6.4 | <b>517@30 eV:</b> 517 (61), 485 (18, <b>a</b> ), 415 (10, <b>b</b> ), 341 (40, <b>c</b> ), 193 (12), 175 (100), 160 (11) |                                                                                                                   |
| C22:0   | C <sub>32</sub> H <sub>52</sub> O <sub>6</sub> | 585 <sup>2</sup> | [M-H] <sup>-</sup> | 531.3707       | 3.0       | 9.7 | <b>531@30 eV:</b> 531 (68), 499 (18, <b>a</b> ), 429 (9, <b>b</b> ), 355 (37, <b>c</b> ), 193 (12), 175 (100), 160 (12)  |                                                                                                                   |
| C23:0   | C <sub>33</sub> H <sub>54</sub> O <sub>6</sub> | 625 <sup>2</sup> | [M-H] <sup>-</sup> | 545.3832       | 2.9       | 13  | <b>545@30 eV:</b> 545 (83), 513 (16, <b>a</b> ), 443 (5, <b>b</b> ), 369 (35, <b>c</b> ), 193 (14), 175 (100), 160 (9)   |                                                                                                                   |
| C24:0   | C <sub>34</sub> H <sub>56</sub> O <sub>6</sub> | 663 <sup>2</sup> | [M-H] <sup>-</sup> | 559.3992       | 2.2       | 5.1 | <b>559@30 eV:</b> 559 (76), 527 (12, <b>a</b> ), 457 (5, <b>b</b> ), 383 (32, <b>c</b> ), 193 (11), 175 (100), 160 (8)   |                                                                                                                   |
| C25:0   | C <sub>35</sub> H <sub>58</sub> O <sub>6</sub> | 700 <sup>2</sup> | [M-H] <sup>-</sup> | 573.4138       | 3.9       | 9.4 | <b>573@30 eV:</b> 573 (90), 541 (5, <b>a</b> ), 471 (4, <b>b</b> ), 397 (21, <b>c</b> ), 193 (10), 175 (100), 160 (7)    |                                                                                                                   |
| C26:0   | C <sub>36</sub> H <sub>60</sub> O <sub>6</sub> | 735 <sup>2</sup> | [M-H] <sup>-</sup> | 587.4313       | 0.7       | 18  | <b>587@30 eV:</b> 587 (100), 555 (8, <b>a</b> ), 485 (3, <b>b</b> ), 411 (26, <b>c</b> ), 193 (14), 175 (91), 160 (6)    |                                                                                                                   |
| C28:0   | C <sub>38</sub> H <sub>64</sub> O <sub>6</sub> | 796 <sup>2</sup> | [M-H] <sup>-</sup> | 615.4612       | 2.9       | 21  | <b>615@30 eV:</b> 615 (100), 583 (7, <b>a</b> ), 513 (2, <b>b</b> ), 439 (22, <b>c</b> ), 193 (8), 175 (95), 160 (7)     |                                                                                                                   |

<sup>1</sup> goodness of fit between measured and calculated isotope pattern (Bruker Daltonics, Data Analysis 4.0)<sup>2</sup> major (*E*)-isomer, minor (*Z*)-isomer elutes 16 s later, isomer ratio (*E*)/(*Z*)  $\approx$  10:1<sup>3</sup> elemental composition of fragment ions supported by accurate mass measurements ( $\pm$  15 ppm), **a**=[M-H-CH<sub>4</sub>O]<sup>-</sup>, **b**=[M-H-C<sub>5</sub>H<sub>10</sub>O<sub>2</sub>]<sup>-</sup>, **c**=[M-H-C<sub>10</sub>H<sub>8</sub>O<sub>3</sub>]<sup>-</sup>,  $m/z$  193=[C<sub>10</sub>H<sub>9</sub>O<sub>3</sub>]<sup>-</sup> Ferulate,  $m/z$  175=[C<sub>10</sub>H<sub>7</sub>O<sub>3</sub>]<sup>-</sup>,  $m/z$  160=[C<sub>9</sub>H<sub>4</sub>O<sub>3</sub>]<sup>-</sup>



**Supplemental Table 6.** Analytical Data of Feruloyloxy Fatty Acid Glycerol Esters Detected by UPLC/ESI(-)-QTOFMS.

| analyte | elemental comp.                                | ret. time [s]        | quantifier ion      |                     |           |     | mSigma <sup>1</sup>                                                                                                                | prominent fragment ions upon CID<br>precursor ion@collision energy: <i>m/z</i> (rel. int. [%], ion type <sup>3</sup> ) |
|---------|------------------------------------------------|----------------------|---------------------|---------------------|-----------|-----|------------------------------------------------------------------------------------------------------------------------------------|------------------------------------------------------------------------------------------------------------------------|
|         |                                                |                      | type                | measured <i>m/z</i> | error ppm |     |                                                                                                                                    |                                                                                                                        |
| C16:0   | C <sub>29</sub> H <sub>46</sub> O <sub>8</sub> | 246/257 <sup>2</sup> | [M-H] <sup>-</sup>  | 521.3106            | 2.7       | 11  | <b>521@30 eV:</b> 521 (11), 506 (20, <b>a</b> ), 447 (100, <b>b</b> ), 429 (52, <b>c</b> ), 271 (18, <b>d</b> ), 193(3), 175 (65)  |                                                                                                                        |
| C18:0   | C <sub>31</sub> H <sub>50</sub> O <sub>8</sub> | 339/350 <sup>2</sup> | [M-H] <sup>-</sup>  | 549.3433            | 0.0       | 4.2 | <b>549@30 eV:</b> 549 (32), 534 (17, <b>a</b> ), 475 (100, <b>b</b> ), 457 (69, <b>c</b> ), 299 (17, <b>d</b> ), 193(7), 175 (65)  |                                                                                                                        |
| C18:1   | C <sub>31</sub> H <sub>48</sub> O <sub>8</sub> | 280/290 <sup>2</sup> | [M-H] <sup>-</sup>  | 547.3277            | 0.1       | 4.2 | <b>547@30 eV:</b> 547 (14), 532 (22, <b>a</b> ), 473 (100, <b>b</b> ), 455 (71, <b>c</b> ), 297 (25, <b>d</b> ), 193(9), 175 (89)  |                                                                                                                        |
| C18:2   | C <sub>31</sub> H <sub>46</sub> O <sub>8</sub> | 225/233 <sup>2</sup> | [M-H] <sup>-</sup>  | 545.3119            | 0.2       | 11  | <b>545@30 eV:</b> 545 (15), 530 (19, <b>a</b> ), 471 (85, <b>b</b> ), 453 (71, <b>c</b> ), 295 (29, <b>d</b> ), 193(11), 175 (100) |                                                                                                                        |
| C19:0   | C <sub>32</sub> H <sub>52</sub> O <sub>8</sub> | 385/397 <sup>2</sup> | [M-H] <sup>-</sup>  | 563.3576            | 2.4       | 21  | <b>563@30 eV:</b> 563 (29), 548 (13, <b>a</b> ), 489 (100, <b>b</b> ), 471 (79, <b>c</b> ) 193(5), 175 (50)                        |                                                                                                                        |
| C20:0   | C <sub>33</sub> H <sub>54</sub> O <sub>8</sub> | 431/443 <sup>2</sup> | [M-H] <sup>-</sup>  | 577.3750            | 0.7       | 6.3 | <b>577@30 eV:</b> 577 (32), 562 (17, <b>a</b> ), 503 (100, <b>b</b> ), 485 (62, <b>c</b> ), 327 (11, <b>d</b> ), 193(6), 175 (57)  |                                                                                                                        |
| C21:0   | C <sub>34</sub> H <sub>56</sub> O <sub>8</sub> | 476/488 <sup>2</sup> | [M-H] <sup>-</sup>  | 591.3894            | 1.4       | 1.9 | <b>591@30 eV:</b> 591 (38), 576 (15, <b>a</b> ), 517 (100, <b>b</b> ), 499 (56, <b>c</b> ), 341 (10, <b>d</b> ), 193(5), 175 (49)  |                                                                                                                        |
| C22:0   | C <sub>35</sub> H <sub>58</sub> O <sub>8</sub> | 519/531 <sup>2</sup> | [M-H] <sup>-</sup>  | 605.4058            | 0.2       | 2.0 | <b>605@30 eV:</b> 605 (43), 590 (12, <b>a</b> ), 531 (100, <b>b</b> ), 513 (51, <b>c</b> ), 355 (8, <b>d</b> ), 193(5), 175 (46)   |                                                                                                                        |
| C23:0   | C <sub>36</sub> H <sub>60</sub> O <sub>8</sub> | 561/573 <sup>2</sup> | [M-H] <sup>-</sup>  | 619.4206            | 1.5       | 4.1 | <b>619@30 eV:</b> 619 (60), 604 (11, <b>a</b> ), 545 (100, <b>b</b> ), 527 (52, <b>c</b> ), 369 (8, <b>d</b> ), 193(5), 175 (43)   |                                                                                                                        |
| C24:0   | C <sub>37</sub> H <sub>62</sub> O <sub>8</sub> | 601/614 <sup>2</sup> | [M-H] <sup>-c</sup> | 633.4355            | 2.7       | 4.4 | <b>633@30 eV:</b> 633 (67), 618 (10, <b>a</b> ), 559 (100, <b>b</b> ), 541 (49, <b>c</b> ), 383 (8, <b>d</b> ), 193(4), 175 (39)   |                                                                                                                        |
| C25:0   | C <sub>38</sub> H <sub>64</sub> O <sub>8</sub> | 641/653 <sup>2</sup> | [M-H] <sup>-c</sup> | 647.4517            | 1.8       | 8.0 | <b>647@30 eV:</b> 647 (81), 632 (10, <b>a</b> ), 573 (100, <b>b</b> ), 555 (47, <b>c</b> ), 397 (8, <b>d</b> ), 193(5), 175 (39)   |                                                                                                                        |
| C26:0   | C <sub>39</sub> H <sub>66</sub> O <sub>8</sub> | 679/690 <sup>2</sup> | [M-H] <sup>-c</sup> | 661.4672            | 2.0       | 3.0 | <b>661@30 eV:</b> 661 (100), 646 (9, <b>a</b> ), 587 (98, <b>b</b> ), 569 (47, <b>c</b> ), 411 (6, <b>d</b> ), 193(4), 175 (37)    |                                                                                                                        |
| C28:0   | C <sub>41</sub> H <sub>70</sub> O <sub>8</sub> | 747/759 <sup>2</sup> | [M-H] <sup>-c</sup> | 689.4998            | 0.0       | 36  | <b>689@30 eV:</b> 689 (100), 674 (7, <b>a</b> ), 615 (83, <b>b</b> ), 597 (19, <b>c</b> ), 193(4), 175 (51)                        |                                                                                                                        |

<sup>1</sup> goodness of fit between measured and calculated isotope pattern (Bruker Daltonics, Data Analysis 4.0)<sup>2</sup> probably constitutional isomers with different linkage between the fatty acid and glycerol, isomer ratio in the range from 3:1 to 1:1<sup>3</sup> elemental composition of fragment ions supported by accurate mass measurements ( $\pm 15$  ppm), **a**=[M-H-CH<sub>3</sub>]<sup>+</sup>, **b**=[M-H-C<sub>3</sub>H<sub>6</sub>O<sub>2</sub>]<sup>+</sup>, **c**=[M-H-C<sub>3</sub>H<sub>6</sub>O<sub>3</sub>]<sup>+</sup>, **d**=[M-H-C<sub>3</sub>H<sub>6</sub>O<sub>2</sub>-C<sub>10</sub>H<sub>8</sub>O<sub>3</sub>]<sup>+</sup>, *m/z* 193=[C<sub>10</sub>H<sub>9</sub>O<sub>4</sub>]<sup>+</sup> Ferulate, *m/z* 175=[C<sub>10</sub>H<sub>7</sub>O<sub>3</sub>]<sup>+</sup>, see also Santos and Graça, *Holzforchung* (2006) **60**, 171-177**Supplemental Table 7.** Analytical Data of Alkyl Ferulates Detected by UPLC/ESI(-)-QTOFMS.

| analyte | elemental comp.                                | ret. time [s]    | quantifier ion     |                     |           |     | mSigma <sup>1</sup>                                                 | prominent fragment ions upon CID<br>precursor ion@collision energy: <i>m/z</i> (rel. int. [%], ion type <sup>3</sup> ) |
|---------|------------------------------------------------|------------------|--------------------|---------------------|-----------|-----|---------------------------------------------------------------------|------------------------------------------------------------------------------------------------------------------------|
|         |                                                |                  | type               | measured <i>m/z</i> | error ppm |     |                                                                     |                                                                                                                        |
| C16:0   | C <sub>26</sub> H <sub>42</sub> O <sub>4</sub> | 612 <sup>2</sup> | [M-H] <sup>-</sup> | 417.2988            | 5.3       | 6.5 | <b>417@30 eV:</b> 417 (2), 402 (100, <b>a</b> ), 177 (8), 133 (10)  |                                                                                                                        |
| C18:0   | C <sub>28</sub> H <sub>46</sub> O <sub>4</sub> | 695 <sup>2</sup> | [M-H] <sup>-</sup> | 445.3306            | 3.9       | 4.8 | <b>445@30 eV:</b> 445 (7), 430 (100, <b>a</b> ), 177 (5), 133 (6)   |                                                                                                                        |
| C19:0   | C <sub>29</sub> H <sub>48</sub> O <sub>4</sub> | 732 <sup>2</sup> | [M-H] <sup>-</sup> | 459.3462            | 3.9       | 4.1 | <b>459@30 eV:</b> 459 (10), 444 (100, <b>a</b> ), 177 (4), 133 (6)  |                                                                                                                        |
| C20:0   | C <sub>30</sub> H <sub>50</sub> O <sub>4</sub> | 767 <sup>2</sup> | [M-H] <sup>-</sup> | 473.3618            | 3.9       | 4.4 | <b>473@30 eV:</b> 473 (16), 458 (100, <b>a</b> ), 177 (3), 133 (3)  |                                                                                                                        |
| C21:0   | C <sub>31</sub> H <sub>52</sub> O <sub>4</sub> | 800 <sup>2</sup> | [M-H] <sup>-</sup> | 487.3773            | 4.1       | 1.3 | <b>487@30 eV:</b> 487 (21), 472 (100, <b>a</b> ), 177 (3), 133 (2)  |                                                                                                                        |
| C22:0   | C <sub>32</sub> H <sub>54</sub> O <sub>4</sub> | 832 <sup>2</sup> | [M-H] <sup>-</sup> | 501.3925            | 4.8       | 1.0 | <b>501@30 eV:</b> 501 (31), 486 (100, <b>a</b> ), 177 (2), 133 (2)  |                                                                                                                        |
| C23:0   | C <sub>33</sub> H <sub>56</sub> O <sub>4</sub> | 859 <sup>2</sup> | [M-H] <sup>-</sup> | 515.4094            | 2.3       | 9.7 | <b>515@40 eV:</b> 515 (4), 500 (100, <b>a</b> ), 177 (13), 133 (43) |                                                                                                                        |
| C24:0   | C <sub>34</sub> H <sub>58</sub> O <sub>4</sub> | 886 <sup>2</sup> | [M-H] <sup>-</sup> | 529.4250            | 2.3       | 3.9 | <b>529@40 eV:</b> 529 (1), 514 (100, <b>a</b> ), 177 (18), 133 (34) |                                                                                                                        |
| C25:0   | C <sub>35</sub> H <sub>60</sub> O <sub>4</sub> | 910 <sup>2</sup> | [M-H] <sup>-</sup> | 543.4404            | 2.7       | 14  | <b>543@40 eV:</b> 543 (1), 528 (100, <b>a</b> ), 177 (17), 133 (20) |                                                                                                                        |
| C26:0   | C <sub>36</sub> H <sub>62</sub> O <sub>4</sub> | 930 <sup>2</sup> | [M-H] <sup>-</sup> | 557.4558            | 3.1       | 11  | <b>557@40 eV:</b> 557 (5), 542 (100, <b>a</b> ), 177 (10), 133 (22) |                                                                                                                        |
| C27:0   | C <sub>37</sub> H <sub>64</sub> O <sub>4</sub> | 952 <sup>2</sup> | [M-H] <sup>-</sup> | 571.4722            | 1.7       | 29  | <b>571@40 eV:</b> 571 (11), 556 (100, <b>a</b> ), 177 (10), 133 (6) |                                                                                                                        |
| C28:0   | C <sub>38</sub> H <sub>66</sub> O <sub>4</sub> | 973 <sup>2</sup> | [M-H] <sup>-</sup> | 585.4867            | 3.6       | 4.1 | <b>585@40 eV:</b> 585 (10), 570 (100, <b>a</b> ), 177 (6), 133 (12) |                                                                                                                        |

<sup>1</sup> goodness of fit between measured and calculated isotope pattern (Bruker Daltonics, Data Analysis 4.0)<sup>2</sup> major (*E*)-isomer, minor (*Z*)-isomer elutes 20 s later, isomer ratio (*E*)/(*Z*) in the range from 8:1 to 12:1<sup>3</sup> elemental composition of fragment ions supported by accurate mass measurements ( $\pm 15$  ppm), **a**=[M-H-CH<sub>3</sub>]<sup>+</sup>, *m/z* 177=[C<sub>9</sub>H<sub>5</sub>O<sub>4</sub>]<sup>+</sup>, *m/z* 133=[C<sub>8</sub>H<sub>5</sub>O<sub>2</sub>]<sup>+</sup>

**Supplemental Table 8.** Analytical Data of Hydroxyalkyl Ferulates Detected by UPLC/ESI(-)-QTOFMS.

| analyte | elemental comp.                                | ret. time [s]    | quantifier ion     |                     |                  | mSigma <sup>a</sup> | prominent fragment ions upon CID<br>precursor ion@collision energy: <i>m/z</i> (rel. int. [%], ion type <sup>3</sup> ) |
|---------|------------------------------------------------|------------------|--------------------|---------------------|------------------|---------------------|------------------------------------------------------------------------------------------------------------------------|
|         |                                                |                  | type               | measured <i>m/z</i> | error <i>ppm</i> |                     |                                                                                                                        |
| C18:0   | C <sub>28</sub> H <sub>46</sub> O <sub>5</sub> | 441 <sup>b</sup> | [M-H] <sup>-</sup> | 461.3262            | 2.3              | 18                  | <b>461@40 eV:</b> 461 (1), 446 (60, <b>a</b> ), 177 (31), 133 (100)                                                    |
| C20:0   | C <sub>30</sub> H <sub>50</sub> O <sub>5</sub> | 535 <sup>b</sup> | [M-H] <sup>-</sup> | 489.3569            | 3.4              | 9.3                 | <b>489@40 eV:</b> 489 (1), 474 (82, <b>a</b> ), 177 (31), 133 (100)                                                    |
| C21:0   | C <sub>31</sub> H <sub>52</sub> O <sub>5</sub> | 577 <sup>b</sup> | [M-H] <sup>-</sup> | 503.3734            | 1.6              | 4.3                 | <b>503@40 eV:</b> 503 (1), 488 (100, <b>a</b> ), 177 (28), 133 (72)                                                    |
| C22:0   | C <sub>32</sub> H <sub>54</sub> O <sub>5</sub> | 620 <sup>b</sup> | [M-H] <sup>-</sup> | 517.3892            | 1.3              | 1.9                 | <b>517@40 eV:</b> 517 (1), 502 (100, <b>a</b> ), 177 (21), 133 (48)                                                    |
| C24:0   | C <sub>34</sub> H <sub>58</sub> O <sub>5</sub> | 699 <sup>b</sup> | [M-H] <sup>-</sup> | 545.4175            | 6.7              | 21                  | <b>545@40 eV:</b> 545 (8), 530 (100, <b>a</b> ), 177 (14), 133 (30)                                                    |

<sup>1</sup> goodness of fit between measured and calculated isotope pattern (Bruker Daltonics, Data Analysis 4.0)<sup>2</sup> major (*E*)-isomer, minor (*Z*)-isomer elutes 20 s later, isomer ratio (*E*)/(*Z*) in the range from 10:1 to 20:1<sup>3</sup> elemental composition of fragment ions supported by accurate mass measurements ( $\pm 15$  ppm), **a**=[M-H-CH<sub>3</sub>]<sup>-</sup>, *m/z* 177=[C<sub>9</sub>H<sub>5</sub>O<sub>4</sub>]<sup>-</sup>, *m/z* 133=[C<sub>8</sub>H<sub>5</sub>O<sub>2</sub>]<sup>-</sup>**Supplemental Table 9.** Analytical Data of Feruloyloxyalkyl Ferulates Detected by UPLC/ESI(-)-QTOFMS.

| analyte | elemental comp.                                | ret. time [s]    | quantifier ion     |                     |                  | mSigma <sup>a</sup> | prominent fragment ions upon CID<br>precursor ion@collision energy: <i>m/z</i> (rel. int. [%], ion type <sup>3</sup> )            |
|---------|------------------------------------------------|------------------|--------------------|---------------------|------------------|---------------------|-----------------------------------------------------------------------------------------------------------------------------------|
|         |                                                |                  | type               | measured <i>m/z</i> | error <i>ppm</i> |                     |                                                                                                                                   |
| C16:0   | C <sub>36</sub> H <sub>50</sub> O <sub>8</sub> | 507 <sup>b</sup> | [M-H] <sup>-</sup> | 609.3446            | 2.1              | 9.3                 | <b>609@30 eV:</b> 609 (28), 594 (6, <b>a</b> ), 433 (100, <b>b</b> ), 418 (21, <b>c</b> ), 401 (12, <b>d</b> ), 193 (9), 175 (50) |
| C18:0   | C <sub>38</sub> H <sub>54</sub> O <sub>8</sub> | 587 <sup>b</sup> | [M-H] <sup>-</sup> | 637.3746            | 0.0              | 6.2                 | <b>637@30 eV:</b> 637 (37), 622 (7, <b>a</b> ), 461 (100, <b>b</b> ), 446 (14, <b>c</b> ), 429 (10, <b>d</b> ), 193 (9), 175 (55) |
| C20:0   | C <sub>40</sub> H <sub>58</sub> O <sub>8</sub> | 660 <sup>b</sup> | [M-H] <sup>-</sup> | 665.4037            | 3.3              | 30                  | <b>665@30 eV:</b> 665 (50), 650 (6, <b>a</b> ), 489 (100, <b>b</b> ), 474 (9, <b>c</b> ), 457 (9, <b>d</b> ), 193 (9), 175 (72)   |
| C22:0   | C <sub>42</sub> H <sub>62</sub> O <sub>8</sub> | 727 <sup>b</sup> | [M-H] <sup>-</sup> | 693.4365            | 1.0              | 12                  | <b>693@30 eV:</b> 693 (71), 678 (5, <b>a</b> ), 517 (100, <b>b</b> ), 502 (7, <b>c</b> ), 485 (8, <b>d</b> ), 193 (11), 175 (75)  |
| C24:0   | C <sub>44</sub> H <sub>66</sub> O <sub>8</sub> | 786 <sup>b</sup> | [M-H] <sup>-</sup> | 721.4671            | 1.9              | 12                  | <b>721@30 eV:</b> 721 (100), 706 (3, <b>a</b> ), 545 (84, <b>b</b> ), 530 (3, <b>c</b> ), 513 (3, <b>d</b> ), 193 (10), 175 (74)  |

<sup>a</sup> goodness of fit between measured and calculated isotope pattern (Bruker Daltonics, Data Analysis 4.0)<sup>b</sup> major (*E*), (*E*)-isomer, minor (*E*), (*Z*)-isomer elutes 18 s later, isomer ratio (*E*), (*E*)/(*E*), (*Z*) in the range from 10:1 to 20:1<sup>c</sup> elemental composition of fragment ions supported by accurate mass measurements ( $\pm 15$  ppm), **a**=[M-H-CH<sub>3</sub>]<sup>-</sup>, **b**=[M-H-C<sub>10</sub>H<sub>8</sub>O<sub>3</sub>]<sup>-</sup>, **c**=[M-H-C<sub>10</sub>H<sub>8</sub>O<sub>3</sub>-CH<sub>3</sub>]<sup>-</sup>, **d**=[M-H-C<sub>10</sub>H<sub>8</sub>O<sub>3</sub>-CH<sub>4</sub>O]<sup>-</sup>, *m/z* 193=[C<sub>10</sub>H<sub>9</sub>O<sub>4</sub>]<sup>-</sup> Ferulate, *m/z* 175=[C<sub>10</sub>H<sub>7</sub>O<sub>3</sub>]<sup>-</sup>

**Supplemental Table 10.** Relative quantification of ferulic acid conjugates,  $\omega$ -hydroxy fatty acids,  $\alpha,\omega$ -dicarboxylic acids and fatty acids in apolar extracts of *ABCG1*-RNAi and control periderm.

Methyl *tert*-butyl ether extracts of *ABCG1*-RNAi [four independent lines (n=32)] and control [wild type (n=8), empty vector (n=8)] tuber periderm were prepared and analyzed by UPLC/PDA/ESI(-)-QTOFMS. Target compounds were relatively quantified using quantifier ions/retention times from Supplemental Material 1. Resulting peak areas were normalized to fresh weight and log<sub>2</sub>-transformed. Shown values represent medians  $\pm$  sd. Significance analysis of differences between *ABCG1*-RNAi and control was performed by *t*-test (two-tailed, unequal variances): \* $P \leq 0.05$ ; \*\* $P \leq 0.01$ ; \*\*\* $P \leq 0.001$ . “-” indicates that the corresponding quantifier ion was below the detection limit.

| Chain Length | Compound Class / Median Response $\pm$ sd |                   |                                        |                   |                 |                   |                        |                   |
|--------------|-------------------------------------------|-------------------|----------------------------------------|-------------------|-----------------|-------------------|------------------------|-------------------|
|              | Feruloyloxy Fatty Acids                   |                   | Feruloyloxy Fatty Acid Glycerol Esters |                   | Alkyl Ferulates |                   | Hydroxyalkyl Ferulates |                   |
|              | <i>control</i>                            | <i>RNAi</i>       | <i>control</i>                         | <i>RNAi</i>       | <i>control</i>  | <i>RNAi</i>       | <i>control</i>         | <i>RNAi</i>       |
| <b>C16:0</b> | 6.6 $\pm$ 0.4                             | 10.8 $\pm$ 1.3*** | 6.9 $\pm$ 0.4                          | 11.0 $\pm$ 0.6*** | 13.2 $\pm$ 1.1  | 10.9 $\pm$ 2.0*** | -                      | -                 |
| <b>C16:1</b> | -                                         | -                 | -                                      | -                 | -               | -                 | -                      | -                 |
| <b>C17:0</b> | -                                         | -                 | -                                      | -                 | -               | -                 | -                      | -                 |
| <b>C18:0</b> | 5.7 $\pm$ 0.9                             | 11.0 $\pm$ 1.1*** | -                                      | 12.7 $\pm$ 0.8    | 11.3 $\pm$ 0.2  | 12.5 $\pm$ 0.7*** | -                      | 9.7 $\pm$ 1.0     |
| <b>C18:1</b> | 6.7 $\pm$ 1.1                             | 12.6 $\pm$ 1.6*** | 7.6 $\pm$ 0.9                          | 12.3 $\pm$ 0.7*** | -               | -                 | -                      | -                 |
| <b>C18:2</b> | 5.6 $\pm$ 0.5                             | 9.0 $\pm$ 0.7***  | -                                      | 11.0 $\pm$ 0.5    | -               | -                 | -                      | -                 |
| <b>C18:3</b> | -                                         | -                 | -                                      | -                 | -               | -                 | -                      | -                 |
| <b>C19:0</b> | -                                         | 8.7 $\pm$ 0.8     | -                                      | 8.8 $\pm$ 0.9     | 9.9 $\pm$ 0.2   | 11.0 $\pm$ 1.3*** | -                      | -                 |
| <b>C20:0</b> | 6.8 $\pm$ 0.3                             | 14.9 $\pm$ 0.7*** | 8.0 $\pm$ 0.5                          | 16.3 $\pm$ 0.5*** | 9.9 $\pm$ 0.3   | 12.8 $\pm$ 0.4*** | -                      | 10.9 $\pm$ 0.7    |
| <b>C21:0</b> | 7.0 $\pm$ 0.4                             | 11.2 $\pm$ 0.7*** | -                                      | 13.1 $\pm$ 0.6    | 12.1 $\pm$ 0.2  | 11.3 $\pm$ 1.2*** | 12.1 $\pm$ 0.2         | 10.9 $\pm$ 0.9*** |
| <b>C22:0</b> | 10.5 $\pm$ 0.3                            | 15.8 $\pm$ 0.5*** | 13.1 $\pm$ 0.4                         | 17.5 $\pm$ 0.3*** | 11.4 $\pm$ 0.1  | 12.8 $\pm$ 0.7*** | 10.2 $\pm$ 0.3         | 13.7 $\pm$ 0.3*** |
| <b>C23:0</b> | 8.5 $\pm$ 0.3                             | 10.4 $\pm$ 0.4*** | 9.1 $\pm$ 0.3                          | 14.4 $\pm$ 0.5*** | 11.2 $\pm$ 0.2  | 9.3 $\pm$ 0.6***  | -                      | -                 |
| <b>C24:0</b> | 10.7 $\pm$ 0.4                            | 14.2 $\pm$ 0.7*** | 12.9 $\pm$ 0.4                         | 16.3 $\pm$ 0.3*** | 11.6 $\pm$ 0.2  | 11.8 $\pm$ 0.8    | 7.8 $\pm$ 0.6          | 10.5 $\pm$ 0.4*** |
| <b>C25:0</b> | 5.4 $\pm$ 0.7                             | 8.7 $\pm$ 0.2***  | 7.8 $\pm$ 0.3                          | 11.7 $\pm$ 0.4*** | 10.3 $\pm$ 0.1  | 9.7 $\pm$ 0.8***  | -                      | -                 |
| <b>C26:0</b> | 8.6 $\pm$ 0.3                             | 11.8 $\pm$ 0.4*** | 11.9 $\pm$ 0.3                         | 13.8 $\pm$ 0.6*** | 11.0 $\pm$ 0.1  | 11.2 $\pm$ 1.4    | -                      | -                 |
| <b>C27:0</b> | -                                         | -                 | -                                      | -                 | 8.4 $\pm$ 0.3   | 8.6 $\pm$ 1.4     | -                      | -                 |
| <b>C28:0</b> | 8.7 $\pm$ 0.2                             | 10.5 $\pm$ 0.7*** | 9.1 $\pm$ 0.7                          | 10.2 $\pm$ 2.1    | 11.0 $\pm$ 0.7  | 10.6 $\pm$ 2.0**  | -                      | -                 |
| <b>C29:0</b> | -                                         | -                 | -                                      | -                 | -               | -                 | -                      | -                 |
| <b>C30:0</b> | -                                         | -                 | -                                      | -                 | -               | -                 | -                      | -                 |

| Chain Length | Compound Class / Median Response $\pm$ sd |                   |                               |                   |                                     |                   |                |                    |
|--------------|-------------------------------------------|-------------------|-------------------------------|-------------------|-------------------------------------|-------------------|----------------|--------------------|
|              | Feruloyloxyalkyl Ferulates                |                   | $\omega$ -Hydroxy Fatty Acids |                   | $\alpha,\omega$ -Dicarboxylic Acids |                   | Fatty Acids    |                    |
|              | <i>control</i>                            | <i>RNAi</i>       | <i>control</i>                | <i>RNAi</i>       | <i>control</i>                      | <i>RNAi</i>       | <i>control</i> | <i>RNAi</i>        |
| <b>C16:0</b> | 11.6 $\pm$ 0.5                            | 12.3 $\pm$ 2.4    | -                             | -                 | -                                   | -                 | 11.4 $\pm$ 0.3 | 12.6 $\pm$ 0.7***  |
| <b>C16:1</b> | -                                         | -                 | -                             | -                 | -                                   | -                 | 4.9 $\pm$ 1.2  | 9.2 $\pm$ 1.0***   |
| <b>C17:0</b> | -                                         | -                 | -                             | -                 | -                                   | -                 | 5.7 $\pm$ 1.0  | 9.9 $\pm$ 1.0***   |
| <b>C18:0</b> | 8.4 $\pm$ 0.2                             | 12.3 $\pm$ 0.8*** | -                             | -                 | -                                   | -                 | 11.4 $\pm$ 0.2 | 13.4 $\pm$ 0.5***  |
| <b>C18:1</b> | -                                         | -                 | -                             | -                 | -                                   | -                 | 9.3 $\pm$ 0.5  | 14.0 $\pm$ 1.0***  |
| <b>C18:2</b> | -                                         | -                 | -                             | -                 | -                                   | -                 | 12.7 $\pm$ 0.3 | 12.8 $\pm$ 0.5     |
| <b>C18:3</b> | -                                         | -                 | -                             | -                 | -                                   | -                 | 10.1 $\pm$ 0.2 | 10.5 $\pm$ 0.6***  |
| <b>C19:0</b> | -                                         | -                 | -                             | -                 | -                                   | -                 | 4.8 $\pm$ 0.5  | 8.8 $\pm$ 0.7***   |
| <b>C20:0</b> | 8.0 $\pm$ 0.9                             | 12.1 $\pm$ 0.3*** | -                             | 11.3 $\pm$ 1.1    | -                                   | 10.7 $\pm$ 1.5    | 8.0 $\pm$ 0.3  | 11.9 $\pm$ 0.4***  |
| <b>C21:0</b> | -                                         | -                 | -                             | 8.2 $\pm$ 1.0     | -                                   | 7.6 $\pm$ 1.1     | 5.8 $\pm$ 0.5  | 9.5 $\pm$ 0.5***   |
| <b>C22:0</b> | 10.7 $\pm$ 0.3                            | 12.9 $\pm$ 0.1*** | 7.2 $\pm$ 0.3                 | 13.0 $\pm$ 0.7*** | 5.2 $\pm$ 0.4                       | 11.7 $\pm$ 1.3*** | 9.4 $\pm$ 0.5  | 11.3 $\pm$ 0.3***  |
| <b>C23:0</b> | -                                         | -                 | -                             | 9.0 $\pm$ 0.8     | -                                   | 7.9 $\pm$ 1.0     | 6.8 $\pm$ 0.5  | 10.01 $\pm$ 0.2*** |
| <b>C24:0</b> | 7.7 $\pm$ 0.6                             | 10.6 $\pm$ 0.4*** | 8.7 $\pm$ 0.2                 | 12.3 $\pm$ 0.5*** | 6.6 $\pm$ 0.3                       | 11.5 $\pm$ 0.8*** | 11.1 $\pm$ 0.2 | 12.1 $\pm$ 0.1***  |
| <b>C25:0</b> | -                                         | -                 | -                             | -                 | -                                   | -                 | 8.9 $\pm$ 0.3  | 11.1 $\pm$ 0.2***  |
| <b>C26:0</b> | -                                         | -                 | 9.1 $\pm$ 0.2                 | 10.7 $\pm$ 0.5*** | 6.8 $\pm$ 0.3                       | 9.2 $\pm$ 0.6***  | 12.5 $\pm$ 0.1 | 12.9 $\pm$ 0.5     |
| <b>C27:0</b> | -                                         | -                 | -                             | -                 | -                                   | -                 | 9.9 $\pm$ 0.2  | 10.7 $\pm$ 1.2     |
| <b>C28:0</b> | -                                         | -                 | 8.9 $\pm$ 0.5                 | 9.1 $\pm$ 0.8     | 7.6 $\pm$ 0.3                       | 8.0 $\pm$ 0.9*    | 13.9 $\pm$ 0.1 | 13.5 $\pm$ 1.4**   |
| <b>C29:0</b> | -                                         | -                 | -                             | -                 | -                                   | -                 | 12.8 $\pm$ 0.1 | 10.7 $\pm$ 1.3***  |
| <b>C30:0</b> | -                                         | -                 | -                             | -                 | -                                   | -                 | 11.7 $\pm$ 0.1 | 10.1 $\pm$ 0.7***  |

**Supplemental Table 11.** Analytical Data of Aromatic Amino Acids, Phenylpropanoids, Anthocyanins and Glycoalkaloids Detected by UPLC/ESI(+)-QTOFMS.

| compound                                                | elemental comp.                                               | ret. time [s] | quantifier ion                      |                     |           |                     | observed fragment ions upon CID<br>precursor ion@collision energy: <i>m/z</i> (rel. int. [%], elemental composition)                                                                                                                                                                                                                                                                                                                                                                                                                                                                                                                                                                                                      |
|---------------------------------------------------------|---------------------------------------------------------------|---------------|-------------------------------------|---------------------|-----------|---------------------|---------------------------------------------------------------------------------------------------------------------------------------------------------------------------------------------------------------------------------------------------------------------------------------------------------------------------------------------------------------------------------------------------------------------------------------------------------------------------------------------------------------------------------------------------------------------------------------------------------------------------------------------------------------------------------------------------------------------------|
|                                                         |                                                               |               | type                                | measured <i>m/z</i> | error ppm | mSigma <sup>1</sup> |                                                                                                                                                                                                                                                                                                                                                                                                                                                                                                                                                                                                                                                                                                                           |
| Phe <sup>3</sup>                                        | C <sub>9</sub> H <sub>11</sub> NO <sub>2</sub>                | 135           | [M+H] <sup>+</sup>                  | 166.0859            | 2.1       | 1.8                 | <b>166@10eV:</b> 166 (8, C <sub>9</sub> H <sub>12</sub> NO <sub>2</sub> <sup>+</sup> ), 149 (3, C <sub>9</sub> H <sub>9</sub> O <sub>2</sub> <sup>+</sup> ), 131 (5, C <sub>9</sub> H <sub>7</sub> O <sup>+</sup> ), 120 (100, C <sub>8</sub> H <sub>10</sub> N <sup>+</sup> ), 107 (1, C <sub>7</sub> H <sub>7</sub> O <sup>+</sup> ), 103 (3, C <sub>8</sub> H <sub>7</sub> <sup>+</sup> )                                                                                                                                                                                                                                                                                                                              |
| Tyr <sup>3</sup>                                        | C <sub>9</sub> H <sub>11</sub> NO <sub>3</sub>                | 79            | [M+H] <sup>+</sup>                  | 182.0804            | 4.1       | 5.1                 | <b>182@10eV:</b> 182 (9, C <sub>9</sub> H <sub>12</sub> NO <sub>3</sub> <sup>+</sup> ), 165 (66, C <sub>9</sub> H <sub>9</sub> O <sub>3</sub> <sup>+</sup> ), 147 (19, C <sub>9</sub> H <sub>7</sub> O <sub>2</sub> <sup>+</sup> ), 136 (100, C <sub>8</sub> H <sub>10</sub> NO <sup>+</sup> ), 123 (26, C <sub>7</sub> H <sub>7</sub> O <sub>2</sub> <sup>+</sup> ), 119 (12, C <sub>8</sub> H <sub>7</sub> O <sup>+</sup> ), 91 (2, C <sub>7</sub> H <sub>7</sub> <sup>+</sup> )                                                                                                                                                                                                                                        |
| Trp <sup>3</sup>                                        | C <sub>11</sub> H <sub>12</sub> N <sub>2</sub> O <sub>2</sub> | 175           | [M+H] <sup>+</sup>                  | 205.0970            | 0.9       | 2.2                 | <b>205@10eV:</b> 205 (2, C <sub>11</sub> H <sub>13</sub> N <sub>2</sub> O <sub>2</sub> <sup>+</sup> ), 188 (100, C <sub>11</sub> H <sub>10</sub> NO <sub>2</sub> <sup>+</sup> ), 159 (4, C <sub>10</sub> H <sub>11</sub> N <sub>2</sub> <sup>+</sup> ), 132 (2, C <sub>9</sub> H <sub>10</sub> N <sup>+</sup> )                                                                                                                                                                                                                                                                                                                                                                                                           |
| Caffeic acid <sup>3</sup>                               | C <sub>9</sub> H <sub>8</sub> O <sub>4</sub>                  | 219           | [M+H] <sup>+</sup>                  | 181.0496            | 0.4       | 5.6                 | <b>181@15eV:</b> 163 (100, C <sub>9</sub> H <sub>7</sub> O <sub>3</sub> <sup>+</sup> ), 145 (55, C <sub>9</sub> H <sub>5</sub> O <sub>2</sub> <sup>+</sup> ), 135 (50, C <sub>8</sub> H <sub>7</sub> O <sub>2</sub> <sup>+</sup> ), 117 (19, C <sub>8</sub> H <sub>5</sub> O <sup>+</sup> ),                                                                                                                                                                                                                                                                                                                                                                                                                              |
| Chlorogenic Acid <sup>3</sup>                           | C <sub>16</sub> H <sub>18</sub> O <sub>9</sub>                | 204/210       | [M+H] <sup>+</sup>                  | 355.1010            | 3.9       | 6.9                 | <b>355@15eV:</b> 337 (1, C <sub>16</sub> H <sub>17</sub> O <sub>8</sub> <sup>+</sup> ), 181 (1, C <sub>9</sub> H <sub>9</sub> O <sub>4</sub> <sup>+</sup> ), 163 (100, C <sub>9</sub> H <sub>7</sub> O <sub>3</sub> <sup>+</sup> ), 145 (2, C <sub>9</sub> H <sub>5</sub> O <sub>2</sub> <sup>+</sup> )                                                                                                                                                                                                                                                                                                                                                                                                                   |
| Cinnamoyl putrescine                                    | C <sub>13</sub> H <sub>18</sub> N <sub>2</sub> O              | 242           | [M+H] <sup>+</sup>                  | 219.1480            | 5.4       | 11.0                | <b>219@10eV:</b> 219 (81, C <sub>13</sub> H <sub>19</sub> N <sub>2</sub> O <sup>+</sup> ), 202 (100, C <sub>13</sub> H <sub>16</sub> NO <sup>+</sup> ), 131 (42, C <sub>6</sub> H <sub>7</sub> O <sup>+</sup> )                                                                                                                                                                                                                                                                                                                                                                                                                                                                                                           |
| Coumaroyl putrescine                                    | C <sub>13</sub> H <sub>18</sub> N <sub>2</sub> O <sub>2</sub> | 182           | [M+H] <sup>+</sup>                  | 235.1428            | 5.6       | 3.2                 | <b>235@10eV:</b> 235 (100, C <sub>13</sub> H <sub>19</sub> N <sub>2</sub> O <sub>2</sub> <sup>+</sup> ), 218 (100, C <sub>13</sub> H <sub>16</sub> NO <sub>2</sub> <sup>+</sup> ), 147 (97, C <sub>9</sub> H <sub>7</sub> O <sub>2</sub> <sup>+</sup> )                                                                                                                                                                                                                                                                                                                                                                                                                                                                   |
| Caffeoyl putrescine <sup>4</sup>                        | C <sub>13</sub> H <sub>18</sub> N <sub>2</sub> O <sub>3</sub> | 163           | [M+H] <sup>+</sup>                  | 251.1397            | 2.6       | 2.5                 | <b>251@15eV:</b> 251 (4, C <sub>13</sub> H <sub>19</sub> N <sub>2</sub> O <sub>3</sub> <sup>+</sup> ), 234 (13, C <sub>13</sub> H <sub>16</sub> NO <sub>3</sub> <sup>+</sup> ), 163 (100, C <sub>9</sub> H <sub>7</sub> O <sub>3</sub> <sup>+</sup> ), 145 (4, C <sub>9</sub> H <sub>5</sub> O <sub>2</sub> <sup>+</sup> ), 135 (2, C <sub>8</sub> H <sub>7</sub> O <sub>2</sub> <sup>+</sup> )                                                                                                                                                                                                                                                                                                                           |
| Dihydrocaffeoyl putrescine                              | C <sub>13</sub> H <sub>20</sub> N <sub>2</sub> O <sub>3</sub> | 138           | [M+H] <sup>+</sup>                  | 253.1542            | 1.7       | 2.8                 | <b>253@15eV:</b> 253 (20, C <sub>13</sub> H <sub>21</sub> N <sub>2</sub> O <sub>3</sub> <sup>+</sup> ), 236 (100, C <sub>13</sub> H <sub>18</sub> NO <sub>3</sub> <sup>+</sup> ), 165 (20, C <sub>9</sub> H <sub>9</sub> O <sub>3</sub> <sup>+</sup> ), 123 (7, C <sub>7</sub> H <sub>7</sub> O <sub>2</sub> <sup>+</sup> )                                                                                                                                                                                                                                                                                                                                                                                               |
| Feruloyl putrescine <sup>4</sup>                        | C <sub>14</sub> H <sub>20</sub> N <sub>2</sub> O <sub>3</sub> | 197           | [M+H] <sup>+</sup>                  | 265.1546            | 0.4       | 1.5                 | <b>265@15eV:</b> 265 (3, C <sub>14</sub> H <sub>21</sub> N <sub>2</sub> O <sub>3</sub> <sup>+</sup> ), 248 (5, C <sub>14</sub> H <sub>18</sub> NO <sub>3</sub> <sup>+</sup> ), 177 (100, C <sub>10</sub> H <sub>9</sub> O <sub>3</sub> <sup>+</sup> ), 149 (1, C <sub>9</sub> H <sub>9</sub> O <sub>2</sub> <sup>+</sup> ), 145 (9, C <sub>9</sub> H <sub>5</sub> O <sub>2</sub> <sup>+</sup> )                                                                                                                                                                                                                                                                                                                           |
| Dihydroferuloyl putrescine                              | C <sub>14</sub> H <sub>22</sub> N <sub>2</sub> O <sub>3</sub> | 174           | [M+H] <sup>+</sup>                  | 267.1695            | 3.2       | 1.8                 | <b>267@15eV:</b> 267 (29, C <sub>14</sub> H <sub>23</sub> N <sub>2</sub> O <sub>3</sub> <sup>+</sup> ), 250 (100, C <sub>14</sub> H <sub>20</sub> NO <sub>3</sub> <sup>+</sup> ), 179 (15, C <sub>10</sub> H <sub>11</sub> O <sub>3</sub> <sup>+</sup> ), 137 (15, C <sub>8</sub> H <sub>9</sub> O <sub>2</sub> <sup>+</sup> )                                                                                                                                                                                                                                                                                                                                                                                            |
| Vanilloyl putrescin                                     | C <sub>12</sub> H <sub>18</sub> N <sub>2</sub> O <sub>3</sub> | 153           | [M+H] <sup>+</sup>                  | 239.1390            | 0.2       | 5.0                 | <b>239@15eV:</b> 239 (5, C <sub>12</sub> H <sub>19</sub> N <sub>2</sub> O <sub>3</sub> <sup>+</sup> ), 222(30, C <sub>12</sub> H <sub>16</sub> NO <sub>3</sub> <sup>+</sup> ), 151(100, C <sub>8</sub> H <sub>7</sub> O <sub>3</sub> <sup>+</sup> )<br><b>239@30eV:</b> 151(100, C <sub>8</sub> H <sub>7</sub> O <sub>3</sub> <sup>+</sup> ), 141(11, C <sub>7</sub> H <sub>9</sub> O <sub>3</sub> <sup>+</sup> ), 123(36, C <sub>7</sub> H <sub>7</sub> O <sub>2</sub> <sup>+</sup> ), 108(9, C <sub>6</sub> H <sub>4</sub> O <sub>2</sub> <sup>+</sup> )                                                                                                                                                                |
| Feruloyl tyramine (FT) <sup>4</sup>                     | C <sub>18</sub> H <sub>19</sub> NO <sub>4</sub>               | 353           | [M+H] <sup>+</sup>                  | 314.1383            | 1.3       | 2.5                 | <b>314@15eV:</b> 314 (24, C <sub>18</sub> H <sub>20</sub> NO <sub>4</sub> <sup>+</sup> ), 194 (2, C <sub>10</sub> H <sub>12</sub> NO <sub>3</sub> <sup>+</sup> ), 177 (100, C <sub>10</sub> H <sub>9</sub> O <sub>3</sub> <sup>+</sup> ), 145 (5, C <sub>19</sub> H <sub>5</sub> O <sub>2</sub> <sup>+</sup> ), 121 (6, C <sub>8</sub> H <sub>9</sub> O <sup>+</sup> )                                                                                                                                                                                                                                                                                                                                                    |
| Feruloyl octopamine (FO) <sup>4</sup>                   | C <sub>18</sub> H <sub>19</sub> NO <sub>5</sub>               | 290           | [M+H-H <sub>2</sub> O] <sup>+</sup> | 312.1212            | 5.8       | 6.7                 | <b>330@15eV:</b> 312 (6, C <sub>18</sub> H <sub>18</sub> NO <sub>4</sub> <sup>+</sup> ), 177 (100, C <sub>10</sub> H <sub>9</sub> O <sub>3</sub> <sup>+</sup> ), 145 (5, C <sub>10</sub> H <sub>5</sub> O <sub>2</sub> <sup>+</sup> )                                                                                                                                                                                                                                                                                                                                                                                                                                                                                     |
| FT-FT Dehydrodimer <sup>4</sup>                         | C <sub>36</sub> H <sub>36</sub> N <sub>2</sub> O <sub>8</sub> | 458           | [M+H] <sup>+</sup>                  | 625.2531            | 2.2       | 5.7                 | <b>625@15eV:</b> 625 (99, C <sub>36</sub> H <sub>37</sub> N <sub>2</sub> O <sub>8</sub> <sup>+</sup> ), 488 (21, C <sub>28</sub> H <sub>26</sub> NO <sub>7</sub> <sup>+</sup> ), 462 (100, C <sub>27</sub> H <sub>26</sub> NO <sub>6</sub> <sup>+</sup> ), 351 (17, C <sub>20</sub> H <sub>15</sub> O <sub>6</sub> <sup>+</sup> ), 325 (45, C <sub>19</sub> H <sub>17</sub> O <sub>5</sub> <sup>+</sup> ), 299 (2, C <sub>18</sub> H <sub>19</sub> O <sub>4</sub> <sup>+</sup> )                                                                                                                                                                                                                                          |
| FT-FO Dehydrodimer <sup>4</sup>                         | C <sub>36</sub> H <sub>36</sub> N <sub>2</sub> O <sub>9</sub> | 407           | [M+H] <sup>+</sup>                  | 641.2598            | 0.7       | - <sup>2</sup>      | <b>641@15eV:</b> 623 (28, C <sub>36</sub> H <sub>35</sub> N <sub>2</sub> O <sub>9</sub> <sup>+</sup> ), 517 (3, C <sub>29</sub> H <sub>29</sub> N <sub>2</sub> O <sub>7</sub> <sup>+</sup> ), 488 (26, C <sub>28</sub> H <sub>26</sub> NO <sub>7</sub> <sup>+</sup> ), 486 (33, C <sub>28</sub> H <sub>24</sub> NO <sub>7</sub> <sup>+</sup> ), 462 (100, C <sub>27</sub> H <sub>28</sub> NO <sub>6</sub> <sup>+</sup> ), 460 (33, C <sub>27</sub> H <sub>26</sub> NO <sub>6</sub> <sup>+</sup> ), 380 (5, C <sub>21</sub> H <sub>18</sub> NO <sub>6</sub> <sup>+</sup> ), 351 (58, C <sub>20</sub> H <sub>15</sub> O <sub>6</sub> <sup>+</sup> ), 325 (97, C <sub>19</sub> H <sub>17</sub> O <sub>5</sub> <sup>+</sup> ) |
| Pelargonidin-3-(coumaroyl-Rha-Glc)-5-Glc <sup>5,6</sup> | C <sub>42</sub> H <sub>47</sub> O <sub>21</sub> <sup>+</sup>  | 272           | [M] <sup>+</sup>                    | 887.2567            | 4.2       | 9.0                 | <b>887@40eV:</b> 887 (1), 725 (12, C <sub>36</sub> H <sub>37</sub> O <sub>16</sub> <sup>+</sup> ), 433 (61, C <sub>21</sub> H <sub>21</sub> O <sub>10</sub> <sup>+</sup> ), 271 (100, C <sub>15</sub> H <sub>11</sub> O <sub>5</sub> <sup>+</sup> )                                                                                                                                                                                                                                                                                                                                                                                                                                                                       |
| Pelargonidin-3-(feruloyl-Rha-Glc)-5-Glc <sup>5,6</sup>  | C <sub>43</sub> H <sub>49</sub> O <sub>22</sub> <sup>+</sup>  | 277           | [M] <sup>+</sup>                    | 917.2659            | 5.5       | 7.5                 | <b>917@40eV:</b> 917 (1), 755 (10, C <sub>37</sub> H <sub>39</sub> O <sub>17</sub> <sup>+</sup> ), 433 (70, C <sub>21</sub> H <sub>21</sub> O <sub>10</sub> <sup>+</sup> ), 271 (100, C <sub>15</sub> H <sub>11</sub> O <sub>5</sub> <sup>+</sup> )                                                                                                                                                                                                                                                                                                                                                                                                                                                                       |
| α-Solanine                                              | C <sub>45</sub> H <sub>73</sub> NO <sub>15</sub>              | 358           | [M+H] <sup>+</sup>                  | 868.5041            | 1.4       | 4.7                 | <b>in-source CID:</b> 868 (73), 850 (1, C <sub>45</sub> H <sub>72</sub> NO <sub>14</sub> <sup>+</sup> ), 722 (5, C <sub>39</sub> H <sub>64</sub> NO <sub>11</sub> <sup>+</sup> ), 706 (1, C <sub>39</sub> H <sub>64</sub> NO <sub>10</sub> <sup>+</sup> ), 560 (47, C <sub>33</sub> H <sub>54</sub> NO <sub>6</sub> <sup>+</sup> ), 446 (100, C <sub>45</sub> H <sub>74</sub> NO <sub>15</sub> Na <sup>2+</sup> ), 398 (67, C <sub>27</sub> H <sub>44</sub> NO <sup>+</sup> ), 309 (29, C <sub>12</sub> H <sub>21</sub> O <sub>9</sub> <sup>+</sup> )                                                                                                                                                                     |
| α-Chaconine                                             | C <sub>45</sub> H <sub>73</sub> NO <sub>14</sub>              | 361           | [M+H] <sup>+</sup>                  | 852.5112            | 1.0       | 6.1                 | <b>in-source CID:</b> 852 (100), 706 (67, C <sub>39</sub> H <sub>64</sub> NO <sub>10</sub> <sup>+</sup> ), 560 (41, C <sub>33</sub> H <sub>54</sub> NO <sub>6</sub> <sup>+</sup> ), 438 (29, C <sub>45</sub> H <sub>74</sub> NO <sub>14</sub> Na <sup>2+</sup> ), 398 (11, C <sub>27</sub> H <sub>44</sub> NO <sup>+</sup> )                                                                                                                                                                                                                                                                                                                                                                                              |

<sup>1</sup> goodness of fit between measured and calculated isotope pattern (Bruker Daltonics, Data Analysis 4.0)<sup>2</sup> isotope pattern interfered by co-eluting compound<sup>3</sup> identified using a commercially available reference compound<sup>4</sup> Serra et al., *Plant J.* (2010) **62**, 277-290, see Supplemental Methods 1 and literature cited therein<sup>5</sup> Sachse, *Z. Lebensm. Unters. Forsch.* (1973) **153**, 294-300<sup>6</sup> Lewis et al., *J. Sci. Food Agric.* (1998) **77**, 45-57

**Supplemental Table 12.** Analytical Data of  $\omega$ -Hydroxy Fatty Acids Detected by UPLC/ESI(-)-QTOFMS.

| analyte | elemental comp.                                | ret. time [s] | quantifier ion      |                     |                  |                     |
|---------|------------------------------------------------|---------------|---------------------|---------------------|------------------|---------------------|
|         |                                                |               | type                | measured <i>m/z</i> | error <i>ppm</i> | mSigma <sup>1</sup> |
| C20:0   | C <sub>20</sub> H <sub>40</sub> O <sub>3</sub> | 326           | [M-H] <sup>-2</sup> | 327.2902            | 0.8              | 6.0                 |
| C21:0   | C <sub>21</sub> H <sub>42</sub> O <sub>3</sub> | 379           | [M-H] <sup>-2</sup> | 341.3075            | 4.0              | 8.7                 |
| C22:0   | C <sub>22</sub> H <sub>44</sub> O <sub>3</sub> | 430           | [M-H] <sup>-2</sup> | 355.3214            | 1.0              | 4.1                 |
| C23:0   | C <sub>23</sub> H <sub>46</sub> O <sub>3</sub> | 481           | [M-H] <sup>-2</sup> | 369.3372            | 0.6              | 2.7                 |
| C24:0   | C <sub>24</sub> H <sub>48</sub> O <sub>3</sub> | 529           | [M-H] <sup>-2</sup> | 383.3524            | 1.7              | 2.5                 |
| C26:0   | C <sub>26</sub> H <sub>52</sub> O <sub>3</sub> | 622           | [M-H] <sup>-2</sup> | 411.3837            | 1.6              | 8.5                 |
| C28:0   | C <sub>28</sub> H <sub>56</sub> O <sub>3</sub> | 707           | [M-H] <sup>-2</sup> | 439.4131            | 5.8              | 6.1                 |

<sup>1</sup> goodness of fit between measured and calculated isotope pattern (Bruker Daltonics, Data Analysis 4.0)

<sup>2</sup> The CID mass spectrum obtained from [M-H]<sup>-</sup> at 20 eV shows the fragment ions [M-H-H<sub>2</sub>O]<sup>-</sup>, [M-H-HCOOH]<sup>-</sup>. The commercially available standards 15-hydroxypentadecanoic acid and 16-hydroxydecanoic acid show similar CID mass spectra.

**Supplemental Table 13.** Analytical Data of  $\alpha,\omega$ -Dicarboxylic Acids Detected by UPLC/ESI(-)-QTOFMS.

| analyte | elemental comp.                                | ret. time [s] | quantifier ion      |                     |                  |                     |
|---------|------------------------------------------------|---------------|---------------------|---------------------|------------------|---------------------|
|         |                                                |               | type                | measured <i>m/z</i> | error <i>ppm</i> | mSigma <sup>1</sup> |
| C20:0   | C <sub>20</sub> H <sub>38</sub> O <sub>4</sub> | 297           | [M-H] <sup>-2</sup> | 341.2694            | 1.0              | 4.1                 |
| C21:0   | C <sub>21</sub> H <sub>40</sub> O <sub>4</sub> | 347           | [M-H] <sup>-2</sup> | 355.2842            | 3.3              | 15                  |
| C22:0   | C <sub>22</sub> H <sub>42</sub> O <sub>4</sub> | 398           | [M-H] <sup>-2</sup> | 369.3011            | 0.2              | 4.2                 |
| C23:0   | C <sub>23</sub> H <sub>44</sub> O <sub>4</sub> | 447           | [M-H] <sup>-2</sup> | 383.3156            | 2.8              | 31                  |
| C24:0   | C <sub>24</sub> H <sub>46</sub> O <sub>4</sub> | 494           | [M-H] <sup>-2</sup> | 397.3308            | 3.9              | 10                  |
| C26:0   | C <sub>26</sub> H <sub>50</sub> O <sub>4</sub> | 584           | [M-H] <sup>-2</sup> | 425.3634            | 0.5              | 30                  |
| C28:0   | C <sub>28</sub> H <sub>54</sub> O <sub>4</sub> | 668           | [M-H] <sup>-2</sup> | 453.3924            | 5.6              | 32                  |

<sup>1</sup> goodness of fit between measured and calculated isotope pattern (Bruker Daltonics, Data Analysis 4.0)

<sup>2</sup> The CID mass spectrum obtained from [M-H]<sup>-</sup> at 20 eV shows the fragment ions [M-H-H<sub>2</sub>O]<sup>-</sup>, [M-H-CO<sub>2</sub>]<sup>-</sup>, [M-H-H<sub>2</sub>O-CO<sub>2</sub>]<sup>-</sup>. The commercially available standards hexadecanedioic acid and octadecanedioic acid show similar CID mass spectra.

**Supplemental Table 14.** Analytical Data of Fatty Acids Detected by UPLC/ESI(-)-QTOFMS.

| analyte            | elemental comp.                                | ret. time [s] | quantifier ion      |              |           |                     |
|--------------------|------------------------------------------------|---------------|---------------------|--------------|-----------|---------------------|
|                    |                                                |               | type                | measured m/z | error ppm | mSigma <sup>1</sup> |
| C16:0 <sup>3</sup> | C <sub>16</sub> H <sub>32</sub> O <sub>2</sub> | 407           | [M-H] <sup>-2</sup> | 255.2332     | 1.0       | 4.2                 |
| C16:1              | C <sub>16</sub> H <sub>30</sub> O <sub>2</sub> | 340           | [M-H] <sup>-2</sup> | 253.2171     | 0.8       | 4.9                 |
| C17:0 <sup>3</sup> | C <sub>17</sub> H <sub>34</sub> O <sub>2</sub> | 461           | [M-H] <sup>-2</sup> | 269.2486     | 0.0       | 4.4                 |
| C18:0 <sup>3</sup> | C <sub>18</sub> H <sub>36</sub> O <sub>2</sub> | 513           | [M-H] <sup>-2</sup> | 283.2641     | 0.5       | 6.1                 |
| C18:1              | C <sub>18</sub> H <sub>34</sub> O <sub>2</sub> | 439           | [M-H] <sup>-2</sup> | 281.2483     | 1.1       | 5.6                 |
| C18:2              | C <sub>18</sub> H <sub>32</sub> O <sub>2</sub> | 371           | [M-H] <sup>-2</sup> | 279.2333     | 1.3       | 2.0                 |
| C18:3              | C <sub>18</sub> H <sub>30</sub> O <sub>2</sub> | 312           | [M-H] <sup>-2</sup> | 277.2170     | 1.1       | 10                  |
| C19:0 <sup>3</sup> | C <sub>19</sub> H <sub>38</sub> O <sub>2</sub> | 563           | [M-H] <sup>-2</sup> | 297.2789     | 3.4       | 7.7                 |
| C20:0 <sup>3</sup> | C <sub>20</sub> H <sub>40</sub> O <sub>2</sub> | 610           | [M-H] <sup>-2</sup> | 311.2946     | 3.1       | 9.9                 |
| C21:0 <sup>3</sup> | C <sub>21</sub> H <sub>42</sub> O <sub>2</sub> | 657           | [M-H] <sup>-2</sup> | 325.3108     | 1.2       | 7.9                 |
| C22:0 <sup>3</sup> | C <sub>22</sub> H <sub>44</sub> O <sub>2</sub> | 700           | [M-H] <sup>-2</sup> | 339.3263     | 1.6       | 2.0                 |
| C23:0 <sup>3</sup> | C <sub>23</sub> H <sub>46</sub> O <sub>2</sub> | 739           | [M-H] <sup>-2</sup> | 353.3411     | 4.0       | 2.4                 |
| C24:0 <sup>3</sup> | C <sub>24</sub> H <sub>48</sub> O <sub>2</sub> | 778           | [M-H] <sup>-2</sup> | 367.3569     | 3.4       | 3.0                 |
| C25:0 <sup>3</sup> | C <sub>25</sub> H <sub>50</sub> O <sub>2</sub> | 813           | [M-H] <sup>-2</sup> | 381.3721     | 4.5       | 8.0                 |
| C26:0 <sup>3</sup> | C <sub>26</sub> H <sub>52</sub> O <sub>2</sub> | 846           | [M-H] <sup>-2</sup> | 395.3887     | 1.9       | 4.3                 |
| C27:0 <sup>3</sup> | C <sub>27</sub> H <sub>54</sub> O <sub>2</sub> | 875           | [M-H] <sup>-2</sup> | 409.4039     | 3.0       | 10                  |
| C28:0 <sup>3</sup> | C <sub>28</sub> H <sub>56</sub> O <sub>2</sub> | 901           | [M-H] <sup>-2</sup> | 423.4191     | 3.9       | 6.6                 |
| C29:0 <sup>3</sup> | C <sub>29</sub> H <sub>58</sub> O <sub>2</sub> | 925           | [M-H] <sup>-2</sup> | 437.4349     | 3.5       | 13                  |
| C30:0 <sup>3</sup> | C <sub>30</sub> H <sub>60</sub> O <sub>2</sub> | 950           | [M-H] <sup>-2</sup> | 451.4501     | 4.3       | 34                  |

<sup>1</sup> goodness of fit between measured and calculated isotope pattern (Bruker Daltonics, Data Analysis 4.0)

<sup>2</sup> In accordance with the literature (Schiesel et al., *Anal. Bioanal. Chem.* (2010) **397**, 147-160), the CID mass spectra obtained from [M-H]<sup>-</sup> in a collision energy range of 10-40 eV do not show prominent fragment ions.

<sup>3</sup> identified using a commercially available reference compound

**Supplemental Table 15.** Analytical Data of Trimethylsilyloxycinnamic Acid Methyl Esters Detected by GC/EI-QMS.

| analyte                              | elemental comp.                                   | M   | ret. time [min] | quantifier ion m/z (rel. int. [%]) | qualifier ions m/z (rel. int. [%]) | MF <sup>1</sup> | internal standard for quantification |
|--------------------------------------|---------------------------------------------------|-----|-----------------|------------------------------------|------------------------------------|-----------------|--------------------------------------|
| Methyl coumarate (1TMS) <sup>2</sup> | C <sub>13</sub> H <sub>18</sub> O <sub>3</sub> Si | 250 | 9.11            | 250 (100)                          | 235 (70) 219 (40)                  | 642             | methyl heptadecanoate                |
| Methyl coumarate (1TMS) <sup>3</sup> | C <sub>13</sub> H <sub>18</sub> O <sub>3</sub> Si | 250 | 10.13           | 250 (100)                          | 235 (70) 219 (40)                  | 869             | methyl heptadecanoate                |
| Methyl ferulate (1TMS) <sup>2</sup>  | C <sub>14</sub> H <sub>20</sub> O <sub>4</sub> Si | 280 | 10.54           | 250 (100)                          | 280 (40) 265 (16)                  | 870             | methyl heptadecanoate                |
| Methyl ferulate (1TMS) <sup>3</sup>  | C <sub>14</sub> H <sub>20</sub> O <sub>4</sub> Si | 280 | 11.92           | 250 (100)                          | 280 (40) 265 (16)                  | 882             | methyl heptadecanoate                |

<sup>1</sup> match factor obtained from NIST MS Search 2.0 using NIST/EPA/NIH Mass Spectral Library 2011

<sup>2</sup> minor isomer

<sup>3</sup> major isomer
